# Supplementary material for: Multiomics Analysis Reveals Molecular Abnormalities in Granulosa Cells of Women With Polycystic Ovary Syndrome
Source: Front Genet. 2021 May 18;12:648701. doi: 10.3389/fgene.2021.648701 (PMC8168535; doi:10.3389/fgene.2021.648701)
Supplement: Supplementary Table 1 — Differentially expressed miRNA-mRNA-lncRNA-CpG-associated genes. [file Data_Sheet_2.xlsx]

## Sheet: mRNA_KEGG
ID	Description	GeneRatio	BgRatio	pvalue	p.adjust	qvalue	geneID	Count
hsa00100	Steroid biosynthesis	10/702	20/8049	1.96855e-06	0.000396129	0.000352621	51478/50814/10682/6713/6307/4047/2222/1717/1595/1056	10
hsa00010	Glycolysis / Gluconeogenesis	19/702	67/8049	2.54745e-06	0.000396129	0.000352621	441531/80201/55902/7167/5315/5230/5223/5214/3945/3939/3099/2821/2597/2026/2023/1737/230/127/125	19
hsa04066	HIF-1 signaling pathway	25/702	109/8049	5.13529e-06	0.000532358	0.000473888	80201/51378/10000/7018/7010/6513/5604/5295/5290/5230/5214/5163/4843/3945/3939/3643/3479/3162/3099/2597/2064/2026/2023/817/230	25
hsa05230	Central carbon metabolism in cancer	18/702	70/8049	2.07682e-05	0.00161473	0.00143738	441531/80201/10000/9123/8140/6513/5604/5315/5295/5290/5223/5214/5163/3945/3939/3417/3099/2064	18
hsa01200	Carbon metabolism	23/702	117/8049	0.000158532	0.00834997	0.00743288	729020/441531/84076/80201/55902/7167/5315/5230/5223/5214/5091/3417/3099/2821/2806/2597/2026/2023/1737/847/230/48/39	23
hsa01230	Biosynthesis of amino acids	17/702	74/8049	0.000161093	0.00834997	0.00743288	729020/441531/84076/7167/5315/5230/5223/5214/5091/3417/2806/2597/2026/2023/384/230/48	17
hsa04510	Focal adhesion	33/702	201/8049	0.000265927	0.0118148	0.0105171	83660/80310/58498/57144/53358/22798/10000/7148/7057/5906/5604/5501/5295/5290/5228/5155/5063/4660/3909/3725/3693/3691/3680/3675/3479/2335/2318/2064/1298/1292/1286/1285/894	33
hsa00900	Terpenoid backbone biosynthesis	8/702	22/8049	0.000340132	0.0132226	0.0117704	51449/4598/4597/3422/3157/3156/2224/39	8
hsa04360	Axon guidance	30/702	181/8049	0.000423047	0.0132757	0.0118176	64221/64218/59277/57144/54961/27289/23380/22854/10512/10509/10500/10371/9037/8829/8633/8482/7474/7223/7222/6608/5590/5295/5290/5163/5063/3983/1947/1943/1073/817	30
hsa04930	Type II diabetes mellitus	12/702	46/8049	0.000426873	0.0132757	0.0118176	80201/9021/8835/8471/5590/5315/5295/5290/3667/3643/3099/775	12
hsa04960	Aldosterone-regulated sodium reabsorption	10/702	37/8049	0.000945383	0.0267286	0.0237929	6340/6338/6337/5295/5290/4306/3667/3643/3479/3291	10
hsa00051	Fructose and mannose metabolism	9/702	33/8049	0.00157693	0.0408687	0.03638	80201/7167/6652/5214/5210/4351/3099/2762/230	9
hsa00650	Butanoate metabolism	8/702	28/8049	0.00206563	0.0494162	0.0439887	341392/142827/116285/65985/6296/3157/39/18	8
hsa04933	AGE-RAGE signaling pathway in diabetic complications	17/702	100/8049	0.00548384	0.1196	0.106464	10000/7412/7042/6401/5590/5332/5295/5292/5290/3725/2335/2308/2152/1958/1286/1285/836	17
hsa05211	Renal cell carcinoma	13/702	69/8049	0.00599323	0.1196	0.106464	57144/10000/9915/7042/6513/5906/5604/5295/5290/5155/5063/3725/2113	13
hsa03320	PPAR signaling pathway	14/702	77/8049	0.00615305	0.1196	0.106464	440503/116519/28965/10580/9415/6319/4023/3157/2180/2170/1622/1593/335/123	14
hsa04216	Ferroptosis	9/702	41/8049	0.00763476	0.132507	0.117954	84557/55240/30061/10162/8031/7018/3162/2180/1356	9
hsa00982	Drug metabolism - cytochrome P450	13/702	71/8049	0.00766922	0.132507	0.117954	7364/4257/4129/2948/2939/2938/2330/1577/1576/1548/316/127/125	13
hsa01524	Platinum drug resistance	13/702	73/8049	0.009695	0.158692	0.141262	10000/7153/5366/5295/5290/4257/2948/2939/2938/2064/1317/836/332	13
hsa00500	Starch and sucrose metabolism	8/702	36/8049	0.0108046	0.168012	0.149559	80201/5837/5836/5169/5167/3099/2821/276	8
hsa04310	Wnt signaling pathway	23/702	160/8049	0.0113906	0.168689	0.150161	144165/85407/84133/80319/64321/57216/50964/23500/8840/8322/7855/7482/7474/6425/6424/5332/4316/4041/4040/3725/2239/894/817	23
hsa02010	ABC transporters	9/702	45/8049	0.0141307	0.195927	0.174408	26154/10351/10058/8647/6890/5826/5243/1672/1080	9
hsa04910	Insulin signaling pathway	20/702	137/8049	0.0149683	0.195927	0.174408	80201/53358/10580/10000/9021/8835/8471/5837/5836/5604/5590/5501/5295/5290/3667/3643/3632/3099/2308/2194	20
hsa04015	Rap1 signaling pathway	28/702	210/8049	0.0151198	0.195927	0.174408	83660/80310/51378/25780/23566/22808/10000/9855/7057/7010/5906/5899/5604/5590/5332/5295/5290/5228/5155/4301/4254/3643/3479/3397/2255/2248/1943/999	28
hsa05224	Breast cancer	21/702	147/8049	0.0161979	0.200272	0.178275	53358/26508/10000/8600/8322/7855/7482/7474/5604/5295/5290/4041/4040/3725/3479/3280/2353/2255/2248/2100/2064	21
hsa04917	Prolactin signaling pathway	12/702	70/8049	0.0169539	0.200272	0.178275	53358/10000/9021/8835/8600/5618/5604/5295/5290/2353/2100/894	12
hsa04072	Phospholipase D signaling pathway	21/702	148/8049	0.0173869	0.200272	0.178275	80310/55326/53358/23566/22808/22800/10000/9846/9266/5899/5604/5338/5332/5295/5290/5155/4254/3643/2768/1606/552	21
hsa04014	Ras signaling pathway	30/702	232/8049	0.0181843	0.201976	0.179793	80310/57144/54331/53358/51378/25780/22808/22800/10000/9846/7010/5906/5899/5604/5338/5322/5295/5290/5228/5155/5063/4301/4254/3643/3481/3479/2255/2248/2113/1943	30
hsa04512	ECM-receptor interaction	14/702	88/8049	0.0194039	0.202215	0.180005	255743/22798/7148/7057/3909/3693/3691/3680/3675/2335/1298/1292/1286/1285	14
hsa05205	Proteoglycans in cancer	27/702	205/8049	0.0195063	0.202215	0.180005	22808/22800/10855/10000/8322/7855/7482/7474/7057/7042/6608/6383/5604/5501/5295/5290/4660/3693/3481/3479/2335/2318/2064/836/817/288/287	27
hsa04929	GnRH secretion	11/702	64/8049	0.021348	0.212434	0.189102	10000/9568/7223/5604/5332/5295/5290/3763/2550/2100/775	11
hsa04010	MAPK signaling pathway	36/702	294/8049	0.0226814	0.212434	0.189102	80310/51378/25780/23542/22808/22800/10000/8550/7786/7042/7010/5906/5604/5228/5155/4254/3925/3725/3654/3643/3556/3481/3479/3164/2768/2353/2318/2255/2248/2122/2064/1943/1843/836/784/775	36
hsa04115	p53 signaling pathway	12/702	73/8049	0.0230847	0.212434	0.189102	56475/55240/51512/8797/7057/5366/5268/3486/3479/983/894/836	12
hsa05410	Hypertrophic cardiomyopathy	14/702	90/8049	0.0232243	0.212434	0.189102	7137/7134/7042/6444/6262/4625/3693/3691/3680/3675/3479/1636/784/775	14
hsa01040	Biosynthesis of unsaturated fatty acids	6/702	27/8049	0.0260709	0.226936	0.202012	79071/51144/9524/9415/6319/3992	6
hsa04979	Cholesterol metabolism	9/702	50/8049	0.0271009	0.226936	0.202012	255738/8647/7416/6770/4023/1593/949/341/335	9
hsa05144	Malaria	9/702	50/8049	0.0271009	0.226936	0.202012	7412/7057/7042/6401/6383/3043/3040/3039/1440	9
hsa04150	mTOR signaling pathway	21/702	155/8049	0.0277286	0.226936	0.202012	96459/64798/54541/51719/23175/10000/8322/8140/7855/7482/7474/5604/5295/5290/4041/4040/3667/3643/3479/2887/525	21
hsa04152	AMPK signaling pathway	17/702	120/8049	0.0307313	0.245062	0.218146	51719/10000/8471/6319/5526/5295/5290/5214/5210/3667/3643/3479/3156/2308/2194/1080/890	17
hsa05418	Fluid shear stress and atherosclerosis	19/702	139/8049	0.0323979	0.251893	0.224227	653361/10000/7412/6401/6383/5590/5327/5295/5290/5155/4257/3725/3162/2948/2939/2938/2353/1843/1728	19
hsa04392	Hippo signaling pathway - multiple species	6/702	29/8049	0.0360892	0.272911	0.242937	166824/126374/84962/60485/54798/8642	6
hsa00140	Steroid hormone biosynthesis	10/702	61/8049	0.0368562	0.272911	0.242937	51478/51144/9420/7364/3291/3290/3284/1583/1577/1576	10
hsa05143	African trypanosomiasis	7/702	37/8049	0.0381751	0.276104	0.245779	7412/6401/5332/3043/3040/3039/335	7
hsa04213	Longevity regulating pathway - multiple species	10/702	62/8049	0.0406576	0.287375	0.255812	10000/8471/6648/5295/5290/3667/3643/3479/2308/847	10
hsa00730	Thiamine metabolism	4/702	16/8049	0.0447655	0.309379	0.2754	122481/250/205/204	4
hsa04931	Insulin resistance	15/702	108/8049	0.0472763	0.314843	0.280263	51085/28965/10000/9882/9021/6513/5837/5836/5590/5501/5295/5290/3667/3643/2308	15
hsa04976	Bile secretion	13/702	90/8049	0.0475807	0.314843	0.280263	338821/28234/10864/9971/8647/7364/6555/6513/5243/3156/1576/1080/949	13
hsa00620	Pyruvate metabolism	7/702	39/8049	0.0490994	0.318123	0.283183	55902/5315/5091/3945/3939/1737/39	7
hsa04151	PI3K-Akt signaling pathway	40/702	354/8049	0.0520846	0.330578	0.294269	80310/54541/54331/51378/23566/22798/10000/7148/7057/7010/5618/5604/5526/5295/5290/5228/5155/4602/4254/3909/3693/3691/3680/3675/3667/3643/3481/3479/3164/2335/2255/2248/2064/1943/1440/1298/1292/1286/1285/894	40
hsa00520	Amino sugar and nucleotide sugar metabolism	8/702	48/8049	0.0538123	0.333483	0.296856	80201/51167/10007/4351/3099/3074/2821/2762	8
hsa04024	cAMP signaling pathway	26/702	216/8049	0.0565159	0.333483	0.296856	22800/10000/9568/7137/6662/6262/5906/5733/5732/5604/5501/5338/5295/5290/4301/3725/2550/2492/2353/1908/1816/1080/817/775/491/268	26
hsa01212	Fatty acid metabolism	9/702	57/8049	0.0567858	0.333483	0.296856	79071/51144/9524/9415/6319/3992/2194/2180/39	9
hsa05225	Hepatocellular carcinoma	21/702	168/8049	0.058405	0.333483	0.296856	53358/10000/8322/8110/7855/7482/7474/7042/6601/5604/5295/5290/4257/4041/4040/3481/3162/2948/2939/2938/1728	21
hsa05146	Amoebiasis	14/702	102/8049	0.0586557	0.333483	0.296856	22798/7042/5332/5295/5290/5273/5269/4843/3909/2335/1286/1285/836/384	14
hsa04514	Cell adhesion molecules	19/702	149/8049	0.0589761	0.333483	0.296856	152404/79679/57502/23705/22854/9076/9073/7412/6401/6383/5797/3680/3135/3126/1462/1272/1002/1001/999	19
hsa00980	Metabolism of xenobiotics by cytochrome P450	11/702	76/8049	0.0642203	0.356652	0.31748	7364/4257/3290/2948/2939/2938/1577/1576/1548/127/125	11
hsa00330	Arginine and proline metabolism	8/702	50/8049	0.0658227	0.359138	0.319693	8974/5033/4843/4129/2806/2628/384/26	8
hsa04974	Protein digestion and absorption	13/702	95/8049	0.0680861	0.364348	0.324331	643834/206358/169044/63036/23436/8645/5222/3784/1301/1298/1292/1286/1285	13
hsa00830	Retinol metabolism	10/702	68/8049	0.0691206	0.364348	0.324331	51109/9227/8854/7364/1577/1576/1548/316/127/125	10
hsa00640	Propanoate metabolism	6/702	34/8049	0.0708355	0.365127	0.325024	79611/55902/3945/3939/39/18	6
hsa04913	Ovarian steroidogenesis	8/702	51/8049	0.0724017	0.365127	0.325024	51478/6770/3643/3479/3284/2492/1583/949	8
hsa05414	Dilated cardiomyopathy	13/702	96/8049	0.0727905	0.365127	0.325024	7137/7134/7042/6444/6262/4625/3693/3691/3680/3675/3479/784/775	13
hsa04922	Glucagon signaling pathway	14/702	106/8049	0.0759723	0.375038	0.333846	441531/150094/10000/6513/5837/5836/5332/5315/5223/5214/3945/3939/2308/817	14
hsa00760	Nicotinate and nicotinamide metabolism	6/702	35/8049	0.0794953	0.378308	0.336758	84618/23475/5169/5167/4837/316	6
hsa04810	Regulation of actin cytoskeleton	25/702	214/8049	0.0799794	0.378308	0.336758	128239/80310/58498/57144/54961/22808/22800/5604/5501/5295/5290/5155/5063/4660/4629/3693/3691/3680/3675/2768/2335/2255/2248/1132/1073	25
hsa01521	EGFR tyrosine kinase inhibitor resistance	11/702	79/8049	0.0802841	0.378308	0.336758	80310/53358/10000/5604/5295/5290/5155/3479/3084/2064/558	11
hsa04218	Cellular senescence	19/702	156/8049	0.0848355	0.393789	0.350538	22808/22800/10114/10000/7416/7042/5604/5501/5295/5290/4605/3486/3135/2308/2113/983/894/890/678	19
hsa04914	Progesterone-mediated oocyte maturation	13/702	99/8049	0.0881469	0.401391	0.357305	132864/22849/10000/9088/5604/5347/5295/5290/3479/995/983/890/699	13
hsa04390	Hippo signaling pathway	19/702	157/8049	0.0890547	0.401391	0.357305	166824/126374/85407/84962/60485/10207/9231/8322/7855/7482/7474/7042/5590/5501/3397/999/894/332/268	19
hsa04935	Growth hormone synthesis, secretion and action	15/702	119/8049	0.0931492	0.410686	0.365579	53358/10000/9021/8835/8471/5604/5332/5295/5290/3726/3667/3486/3479/2353/775	15
hsa05218	Melanoma	10/702	72/8049	0.0937579	0.410686	0.365579	80310/10000/5604/5295/5290/5155/3479/2255/2248/999	10
hsa05226	Gastric cancer	18/702	149/8049	0.0971929	0.414593	0.369057	53358/10000/8322/7855/7482/7474/7042/5604/5295/5290/5243/4041/4040/3728/2255/2248/2064/999	18
hsa05166	Human T-cell leukemia virus 1 infection	25/702	219/8049	0.0980657	0.414593	0.369057	83660/10000/8829/7538/7416/7042/6513/5604/5295/5290/4487/4316/3725/3135/3126/2353/2224/2113/1959/1958/991/894/890/701/567	25
hsa05204	Chemical carcinogenesis	11/702	82/8049	0.0986492	0.414593	0.369057	7364/4257/3290/2948/2939/2938/1577/1576/1548/127/125	11
hsa05222	Small cell lung cancer	12/702	92/8049	0.102449	0.424823	0.378164	22798/10000/9618/5295/5290/4843/3909/3675/2335/1286/1285/836	12
hsa04068	FoxO signaling pathway	16/702	131/8049	0.105151	0.430289	0.383029	10000/9455/8471/7042/6648/5604/5347/5295/5290/3667/3643/3479/2308/894/847/664	16
hsa04927	Cortisol synthesis and secretion	9/702	65/8049	0.109826	0.437166	0.389151	56246/6770/5332/3739/3284/3164/1583/949/775	9
hsa04973	Carbohydrate digestion and absorption	7/702	47/8049	0.110992	0.437166	0.389151	80201/10000/5332/5295/5290/3099/276	7
hsa04923	Regulation of lipolysis in adipocytes	8/702	56/8049	0.111049	0.437166	0.389151	51099/10000/8471/5733/5295/5290/3667/3643	8
hsa00020	Citrate cycle (TCA cycle)	5/702	30/8049	0.115286	0.442641	0.394025	5091/3417/1737/48/47	5
hsa00030	Pentose phosphate pathway	5/702	30/8049	0.115286	0.442641	0.394025	729020/84076/5214/2821/230	5
hsa04012	ErbB signaling pathway	11/702	85/8049	0.119313	0.448284	0.399048	57144/53358/10000/5604/5295/5290/5063/3725/3084/2064/817	11
hsa00480	Glutathione metabolism	8/702	57/8049	0.119908	0.448284	0.399048	79017/9588/4257/3417/2948/2939/2938/2878	8
hsa05221	Acute myeloid leukemia	9/702	67/8049	0.126344	0.448284	0.399048	10000/7704/5604/5295/5292/5290/3728/1053/890	9
hsa04742	Taste transduction	11/702	86/8049	0.126704	0.448284	0.399048	342372/259287/9568/8645/6340/6338/6337/6335/5332/2550/775	11
hsa05210	Colorectal cancer	11/702	86/8049	0.126704	0.448284	0.399048	10000/7042/5899/5604/5366/5295/5290/3725/2353/836/332	11
hsa00270	Cysteine and methionine metabolism	7/702	49/8049	0.130942	0.448284	0.399048	64902/4357/3945/3939/2806/1788/1036	7
hsa05412	Arrhythmogenic right ventricular cardiomyopathy	10/702	77/8049	0.131	0.448284	0.399048	6444/6262/3728/3693/3691/3680/3675/1832/784/775	10
hsa00260	Glycine, serine and threonine metabolism	6/702	40/8049	0.131069	0.448284	0.399048	441531/64902/55349/5223/4129/2628	6
hsa04928	Parathyroid hormone synthesis, secretion and action	13/702	106/8049	0.131286	0.448284	0.399048	50964/10568/8600/5604/5338/5332/4325/4041/4040/2768/2353/1958/846	13
hsa05165	Human papillomavirus infection	35/702	331/8049	0.132329	0.448284	0.399048	84441/26508/22798/10207/10134/10000/8322/7855/7482/7474/7148/7057/5604/5590/5526/5315/5295/5290/3909/3693/3691/3680/3675/3280/3135/2335/2308/1298/1292/1286/1285/894/890/836/525	35
hsa05322	Systemic lupus erythematosus	16/702	136/8049	0.133697	0.448284	0.399048	55506/8969/8968/8359/8358/8355/8352/8348/8340/8335/8331/8294/3126/2215/730/718	16
hsa05215	Prostate cancer	12/702	97/8049	0.13669	0.448284	0.399048	80310/10000/7113/5604/5327/5295/5290/5155/3479/2308/2064/354	12
hsa00603	Glycosphingolipid biosynthesis - globo and isoglobo series	3/702	15/8049	0.136936	0.448284	0.399048	10317/6489/3074	3
hsa00604	Glycosphingolipid biosynthesis - ganglio series	3/702	15/8049	0.136936	0.448284	0.399048	30815/6489/3074	3
hsa04978	Mineral absorption	8/702	59/8049	0.138708	0.449355	0.400001	79901/55630/30061/10568/7018/3162/1317/491	8
hsa04380	Osteoclast differentiation	15/702	128/8049	0.14637	0.469291	0.417747	653361/10000/9846/9021/8600/7042/5604/5295/5290/4982/3726/3725/2354/2353/2215	15
hsa04727	GABAergic synapse	11/702	89/8049	0.150342	0.477106	0.424704	54331/9568/6540/6538/5334/3763/2564/2560/2550/775/18	11
hsa05202	Transcriptional misregulation in cancer	21/702	192/8049	0.164688	0.517353	0.460531	9915/8968/8842/8358/8355/8352/8013/7704/7113/7102/6495/5327/3728/3486/3479/3248/2308/1668/1053/894/890	21
hsa04975	Fat digestion and absorption	6/702	43/8049	0.168078	0.522724	0.465312	5322/2806/1056/949/335/39	6
hsa04668	TNF signaling pathway	13/702	112/8049	0.176134	0.542354	0.482786	153090/10000/9021/7412/6401/6372/5604/5295/5290/3726/3725/2353/836	13
hsa00350	Tyrosine metabolism	5/702	35/8049	0.18557	0.565807	0.503663	4129/2806/316/127/125	5
hsa04110	Cell cycle	14/702	124/8049	0.191138	0.577126	0.513739	9088/7272/7042/5347/4176/4174/1028/995/991/983/894/890/701/699	14
hsa03030	DNA replication	5/702	36/8049	0.201191	0.590439	0.52559	56655/5983/5425/4176/4174	5
hsa01210	2-Oxocarboxylic acid metabolism	3/702	18/8049	0.203362	0.590439	0.52559	3417/2806/48	3
hsa05214	Glioma	9/702	75/8049	0.204236	0.590439	0.52559	53358/10000/8536/5604/5295/5290/5155/3479/817	9
hsa04610	Complement and coagulation cascades	10/702	85/8049	0.204374	0.590439	0.52559	5327/3080/3075/2266/2153/2152/966/730/718/629	10
hsa04210	Apoptosis	15/702	136/8049	0.20504	0.590439	0.52559	153090/51807/10000/8797/5783/5604/5366/5295/5290/3725/2353/1515/1075/836/332	15
hsa05150	Staphylococcus aureus infection	11/702	96/8049	0.213382	0.601904	0.535795	3880/3875/3872/3126/3075/2266/2215/1672/1668/718/629	11
hsa00072	Synthesis and degradation of ketone bodies	2/702	10/8049	0.214827	0.601904	0.535795	3157/39	2
hsa00920	Sulfur metabolism	2/702	10/8049	0.214827	0.601904	0.535795	23474/4357	2
hsa04915	Estrogen signaling pathway	15/702	138/8049	0.221197	0.614218	0.546757	53358/10000/9568/5604/5332/5295/5290/3880/3875/3872/3763/3725/2550/2353/2100	15
hsa05140	Leishmaniasis	9/702	77/8049	0.226287	0.61913	0.551129	653361/7042/4843/3725/3654/3126/2353/2215/718	9
hsa00531	Glycosaminoglycan degradation	3/702	19/8049	0.226948	0.61913	0.551129	10855/3423/3074	3
hsa04926	Relaxin signaling pathway	14/702	129/8049	0.233047	0.619816	0.55174	59350/54331/53358/10000/5604/5590/5332/5295/5290/4843/3725/2353/1286/1285	14
hsa01522	Endocrine resistance	11/702	98/8049	0.233178	0.619816	0.55174	53358/10000/8647/5604/5295/5290/3725/3479/2353/2100/2064	11
hsa05231	Choline metabolism in cancer	11/702	98/8049	0.233178	0.619816	0.55174	204962/80310/10000/5604/5338/5295/5290/5155/3725/2353/1606	11
hsa00280	Valine, leucine and isoleucine degradation	6/702	48/8049	0.23787	0.62693	0.558073	65985/64902/3157/316/39/18	6
hsa04211	Longevity regulating pathway	10/702	89/8049	0.246427	0.644024	0.573289	10000/8471/6648/5295/5290/3667/3643/3479/2308/847	10
hsa00983	Drug metabolism - other enzymes	9/702	79/8049	0.24918	0.645167	0.574307	151531/7364/4830/4257/2948/2939/2938/1576/1548	9
hsa00532	Glycosaminoglycan biosynthesis - chondroitin sulfate / dermatan sulfate	3/702	20/8049	0.251013	0.645167	0.574307	56548/55790/10090	3
hsa00630	Glyoxylate and dicarboxylate metabolism	4/702	30/8049	0.263309	0.665027	0.591986	55902/847/48/39	4
hsa04550	Signaling pathways regulating pluripotency of stem cells	15/702	143/8049	0.263822	0.665027	0.591986	10000/8322/7855/7482/7474/7044/6926/6498/5604/5295/5290/4093/3479/3399/3397	15
hsa04972	Pancreatic secretion	11/702	102/8049	0.274716	0.665027	0.591986	63036/23436/6262/5906/5332/5322/3784/1080/1056/491/276	11
hsa05142	Chagas disease	11/702	102/8049	0.274716	0.665027	0.591986	10000/7042/5332/5295/5290/4843/3725/3654/2353/1636/718	11
hsa05034	Alcoholism	19/702	187/8049	0.275104	0.665027	0.591986	55506/54331/53358/10014/8969/8968/8359/8358/8355/8352/8348/8340/8335/8331/8294/5604/5501/4129/2354	19
hsa00220	Arginine biosynthesis	3/702	21/8049	0.275425	0.665027	0.591986	4843/2806/384	3
hsa00770	Pantothenate and CoA biosynthesis	3/702	21/8049	0.275425	0.665027	0.591986	8875/5169/5167	3
hsa04934	Cushing syndrome	16/702	155/8049	0.275847	0.665027	0.591986	56246/8322/7855/7482/7474/6770/5906/5604/5332/3739/3284/3164/1583/949/817/775	16
hsa04725	Cholinergic synapse	12/702	113/8049	0.27983	0.665911	0.592772	54331/10000/5604/5332/5295/5290/3784/3763/2353/1132/817/775	12
hsa00561	Glycerolipid metabolism	7/702	61/8049	0.280496	0.665911	0.592772	129642/80339/55326/23175/4023/1606/1056	7
hsa05219	Bladder cancer	5/702	41/8049	0.284767	0.667686	0.594352	7057/5604/2064/1612/999	5
hsa04022	cGMP-PKG signaling pathway	17/702	167/8049	0.286997	0.667686	0.594352	10242/10000/8471/7416/5604/5501/5332/4879/4625/3764/3667/3643/2768/775/491/151/150	17
hsa04270	Vascular smooth muscle contraction	14/702	135/8049	0.287685	0.667686	0.594352	94274/10267/10242/5604/5501/5332/5322/4879/4660/4629/2768/1908/775/552	14
hsa04146	Peroxisome	9/702	83/8049	0.297062	0.6683	0.594899	54677/8528/6648/5826/4843/4598/3417/2180/847	9
hsa00340	Histidine metabolism	3/702	22/8049	0.300057	0.6683	0.594899	4129/3034/26	3
hsa05170	Human immunodeficiency virus 1 infection	21/702	212/8049	0.301537	0.6683	0.594899	60489/57144/54331/25939/10000/6890/5604/5295/5290/5063/3725/3654/3135/2923/2353/1174/1073/995/983/836/567	21
hsa00380	Tryptophan metabolism	5/702	42/8049	0.302264	0.6683	0.594899	4129/847/316/39/26	5
hsa04350	TGF-beta signaling pathway	10/702	94/8049	0.302733	0.6683	0.594899	79875/8646/7057/7044/7042/4093/4091/3399/3397/268	10
hsa00562	Inositol phosphate metabolism	8/702	73/8049	0.302991	0.6683	0.594899	55586/8898/7167/5332/5290/5286/4534/3632	8
hsa05100	Bacterial invasion of epithelial cells	8/702	73/8049	0.302991	0.6683	0.594899	79658/53358/23176/23157/5295/5290/2335/999	8
hsa04114	Oocyte meiosis	13/702	128/8049	0.324065	0.709748	0.631795	132864/22849/9088/5604/5526/5501/5347/3479/995/991/983/817/699	13
hsa05133	Pertussis	8/702	76/8049	0.3431	0.735175	0.654429	6372/4843/3725/3654/2353/1073/836/718	8
hsa05212	Pancreatic cancer	8/702	76/8049	0.3431	0.735175	0.654429	10000/7042/5899/5604/5338/5295/5290/2064	8
hsa05220	Chronic myeloid leukemia	8/702	76/8049	0.3431	0.735175	0.654429	53358/10000/9846/7042/5604/5295/5290/2122	8
hsa00533	Glycosaminoglycan biosynthesis - keratan sulfate	2/702	14/8049	0.348505	0.735175	0.654429	93010/8534	2
hsa04977	Vitamin digestion and absorption	3/702	24/8049	0.349525	0.735175	0.654429	9227/949/335	3
hsa04925	Aldosterone synthesis and secretion	10/702	98/8049	0.349858	0.735175	0.654429	8536/6770/5332/3284/3164/1583/949/817/775/491	10
hsa04919	Thyroid hormone signaling pathway	12/702	121/8049	0.364493	0.760787	0.677228	53919/10000/9882/6513/5604/5332/5295/5290/5214/4625/2308/1827	12
hsa04720	Long-term potentiation	7/702	67/8049	0.367113	0.761147	0.677548	5906/5604/5502/5501/5332/817/775	7
hsa05206	MicroRNAs in cancer	29/702	310/8049	0.372988	0.768207	0.683833	90427/54541/27086/23414/10014/9493/7431/7148/7057/7042/6659/6624/5604/5295/5292/5290/5268/5243/5155/4325/3925/3667/3162/2064/1943/1788/995/894/836	29
hsa00240	Pyrimidine metabolism	6/702	57/8049	0.37857	0.774574	0.6895	151531/84618/5169/5167/4830/956	6
hsa00250	Alanine, aspartate and glutamate metabolism	4/702	36/8049	0.385385	0.783364	0.697326	64902/8528/2806/18	4
hsa00514	Other types of O-glycan biosynthesis	5/702	47/8049	0.391302	0.790227	0.703434	285203/114805/84620/29071/6480	5
hsa05213	Endometrial cancer	6/702	58/8049	0.394645	0.790543	0.703716	10000/5604/5295/5290/2064/999	6
hsa05031	Amphetamine addiction	7/702	69/8049	0.396543	0.790543	0.703716	5501/4129/3725/2354/2353/817/775	7
hsa05216	Thyroid cancer	4/702	37/8049	0.405767	0.80378	0.715499	8031/8030/5604/999	4
hsa00360	Phenylalanine metabolism	2/702	16/8049	0.41289	0.808257	0.719485	4129/2806	2
hsa05203	Viral carcinogenesis	19/702	204/8049	0.416946	0.808257	0.719485	10014/8359/8348/8340/8294/5366/5315/5295/5290/3725/3135/1960/1959/991/983/894/890/836/718	19
hsa00062	Fatty acid elongation	3/702	27/8049	0.422765	0.808257	0.719485	79071/51144/9524	3
hsa00601	Glycosphingolipid biosynthesis - lacto and neolacto series	3/702	27/8049	0.422765	0.808257	0.719485	10402/10317/6489	3
hsa04666	Fc gamma R-mediated phagocytosis	9/702	93/8049	0.423599	0.808257	0.719485	653361/10000/9846/5604/5338/5295/5290/2215/1073	9
hsa04520	Adherens junction	7/702	71/8049	0.425965	0.808257	0.719485	10580/9855/5797/4301/3643/2064/999	7
hsa04261	Adrenergic signaling in cardiomyocytes	14/702	149/8049	0.426219	0.808257	0.719485	10000/7137/7134/6262/5526/5502/5501/5332/4625/3784/817/784/775/491	14
hsa04657	IL-17 signaling pathway	9/702	94/8049	0.436397	0.822542	0.7322	727897/9618/6372/3934/3725/2354/2353/1440/836	9
hsa00120	Primary bile acid biosynthesis	2/702	17/8049	0.443889	0.831623	0.740284	9420/1593	2
hsa04145	Phagosome	14/702	152/8049	0.456588	0.848648	0.755439	653361/51807/10382/10332/9902/7057/6890/3693/3135/3126/2215/949/718/525	14
hsa00230	Purine metabolism	12/702	130/8049	0.463067	0.848648	0.755439	122481/84618/11164/10606/5315/5169/5167/4830/956/353/205/204	12
hsa05020	Prion diseases	4/702	40/8049	0.465928	0.848648	0.755439	5604/3309/1958/730	4
hsa04071	Sphingolipid signaling pathway	11/702	119/8049	0.46662	0.848648	0.755439	79603/10000/9846/5604/5590/5526/5338/5332/5295/5290/2768	11
hsa04722	Neurotrophin signaling pathway	11/702	119/8049	0.46662	0.848648	0.755439	53358/10000/9500/5906/5604/5295/5290/3725/3667/3654/817	11
hsa00061	Fatty acid biosynthesis	2/702	18/8049	0.473955	0.852621	0.758975	2194/2180	2
hsa05217	Basal cell carcinoma	6/702	63/8049	0.474287	0.852621	0.758975	374654/8322/7855/7482/7474/6608	6
hsa04911	Insulin secretion	8/702	86/8049	0.479108	0.856337	0.762283	10242/9699/6513/6262/5864/5332/817/775	8
hsa04728	Dopaminergic synapse	12/702	132/8049	0.484853	0.861652	0.767015	54331/10000/5526/5501/5332/4129/3763/2353/1816/817/775/406	12
hsa04260	Cardiac muscle contraction	8/702	87/8049	0.492489	0.870251	0.774669	84679/7137/7134/6262/4625/845/784/775	8
hsa00860	Porphyrin and chlorophyll metabolism	4/702	42/8049	0.504803	0.88697	0.789552	326625/7364/3162/1356	4
hsa00052	Galactose metabolism	3/702	31/8049	0.51545	0.895559	0.797197	80201/5214/3099	3
hsa04710	Circadian rhythm	3/702	31/8049	0.51545	0.895559	0.797197	6095/4862/406	3
hsa04612	Antigen processing and presentation	7/702	78/8049	0.526695	0.90202	0.802949	6890/5721/3309/3135/3126/2923/567	7
hsa04721	Synaptic vesicle cycle	7/702	78/8049	0.526695	0.90202	0.802949	57030/22999/10814/6540/6538/5864/525	7
hsa00512	Mucin type O-glycan biosynthesis	3/702	32/8049	0.537369	0.90202	0.802949	114805/55808/29071	3
hsa04215	Apoptosis - multiple species	3/702	32/8049	0.537369	0.90202	0.802949	5366/836/332	3
hsa04140	Autophagy - animal	12/702	137/8049	0.538399	0.90202	0.802949	64798/54541/22808/22800/10000/8471/5604/5295/5290/3667/1612/664	12
hsa04371	Apelin signaling pathway	12/702	137/8049	0.538399	0.90202	0.802949	54331/22808/22800/10014/10000/6262/5604/5332/5327/4843/1958/999	12
hsa03018	RNA degradation	7/702	79/8049	0.540579	0.90202	0.802949	154197/10200/10140/7832/5214/2026/2023	7
hsa00071	Fatty acid degradation	4/702	44/8049	0.542372	0.90202	0.802949	2180/127/125/39	4
hsa04726	Serotonergic synapse	10/702	115/8049	0.552581	0.913287	0.812979	260293/54331/5604/5332/4129/3763/2560/1843/836/775	10
hsa04530	Tight junction	14/702	162/8049	0.555771	0.913287	0.812979	84952/54566/51807/51421/10207/9076/9073/5906/5590/4629/4301/3725/2064/1080	14
hsa03410	Base excision repair	3/702	33/8049	0.558711	0.913287	0.812979	79661/56655/5425	3
hsa04625	C-type lectin receptor signaling pathway	9/702	104/8049	0.560894	0.913287	0.812979	22808/22800/10332/10000/5295/5290/3725/1960/1959	9
hsa04920	Adipocytokine signaling pathway	6/702	69/8049	0.565339	0.915732	0.815155	10000/9021/8471/6513/3667/2180	6
hsa05323	Rheumatoid arthritis	8/702	93/8049	0.57031	0.918997	0.818062	8600/7042/7010/6372/3725/3126/2353/525	8
hsa00040	Pentose and glucuronate interconversions	3/702	34/8049	0.579449	0.926891	0.825089	729020/7364/6652	3
hsa04662	B cell receptor signaling pathway	7/702	82/8049	0.58117	0.926891	0.825089	25780/10000/5604/5295/5290/3725/2353	7
hsa04921	Oxytocin signaling pathway	13/702	154/8049	0.591827	0.939073	0.835932	8536/6262/5604/5501/5332/4660/3763/3725/2353/1827/817/784/775	13
hsa03420	Nucleotide excision repair	4/702	47/8049	0.595833	0.94063	0.837318	56655/5983/5425/1069	4
hsa03060	Protein export	2/702	23/8049	0.608363	0.943157	0.839568	58477/3309	2
hsa03430	Mismatch repair	2/702	23/8049	0.608363	0.943157	0.839568	5983/5425	2
hsa04730	Long-term depression	5/702	60/8049	0.609565	0.943157	0.839568	5604/5332/3479/2895/2768	5
hsa05416	Viral myocarditis	5/702	60/8049	0.609565	0.943157	0.839568	6444/4625/3135/3126/836	5
hsa04070	Phosphatidylinositol signaling system	8/702	97/8049	0.619076	0.948436	0.844267	8898/5332/5295/5290/5286/4534/3632/1606	8
hsa04713	Circadian entrainment	8/702	97/8049	0.619076	0.948436	0.844267	54331/6262/5332/4543/3763/2353/817/775	8
hsa00564	Glycerophospholipid metabolism	8/702	98/8049	0.630799	0.949503	0.845216	129642/55326/55224/23175/10162/5338/5322/1606	8
hsa00534	Glycosaminoglycan biosynthesis - heparan sulfate / heparin	2/702	24/8049	0.631894	0.949503	0.845216	64579/9955	2
hsa00130	Ubiquinone and other terpenoid-quinone biosynthesis	1/702	11/8049	0.63376	0.949503	0.845216	1728	1
hsa00430	Taurine and hypotaurine metabolism	1/702	11/8049	0.63376	0.949503	0.845216	1036	1
hsa05131	Shigellosis	20/702	242/8049	0.635037	0.949503	0.845216	83660/80201/58498/23176/23157/10000/9266/8968/8358/8355/8352/7416/5332/5295/5290/3725/3099/2308/718/664	20
hsa00510	N-Glycan biosynthesis	4/702	50/8049	0.645395	0.950413	0.846027	84620/11320/6480/4249	4
hsa05110	Vibrio cholerae infection	4/702	50/8049	0.645395	0.950413	0.846027	30001/3784/1080/525	4
hsa00590	Arachidonic acid metabolism	5/702	63/8049	0.653222	0.950413	0.846027	9536/5740/5322/4048/2878	5
hsa04750	Inflammatory mediator regulation of TRP channels	8/702	100/8049	0.653641	0.950413	0.846027	5732/5501/5332/5295/5290/3556/3479/817	8
hsa00592	alpha-Linolenic acid metabolism	2/702	25/8049	0.654306	0.950413	0.846027	9415/5322	2
hsa04540	Gap junction	7/702	88/8049	0.656671	0.950413	0.846027	80310/51807/10382/5604/5332/5155/983	7
hsa04916	Melanogenesis	8/702	101/8049	0.664748	0.950413	0.846027	8322/7855/7482/7474/5604/5332/4254/817	8
hsa04630	JAK-STAT signaling pathway	13/702	162/8049	0.665659	0.950413	0.846027	338376/10000/9021/8835/5618/5295/5292/5290/5155/1489/1440/894/316	13
hsa05161	Hepatitis B	13/702	162/8049	0.665659	0.950413	0.846027	10000/7042/5604/5295/5290/3725/3654/2353/1960/1959/890/836/332	13
hsa04670	Leukocyte transendothelial migration	9/702	114/8049	0.672404	0.950413	0.846027	653361/58498/9076/9073/7412/5906/5295/5290/4301	9
hsa04724	Glutamatergic synapse	9/702	114/8049	0.672404	0.950413	0.846027	57030/54331/50944/9455/9229/5338/5332/2897/775	9
hsa00790	Folate biosynthesis	2/702	26/8049	0.675615	0.950413	0.846027	55034/250	2
hsa04950	Maturity onset diabetes of the young	2/702	26/8049	0.675615	0.950413	0.846027	4760/3280	2
hsa05132	Salmonella infection	17/702	213/8049	0.686825	0.950413	0.846027	147700/58498/10000/9266/8797/6281/5604/5290/5286/5063/3725/3654/2597/2353/2318/836/388	17
hsa04020	Calcium signaling pathway	16/702	201/8049	0.687582	0.950413	0.846027	80310/8536/7416/7134/6262/5733/5332/5155/4843/2064/1816/845/817/775/552/491	16
hsa05033	Nicotine addiction	3/702	40/8049	0.69033	0.950413	0.846027	57030/2564/2560	3
hsa04330	Notch signaling pathway	4/702	53/8049	0.690777	0.950413	0.846027	84441/26508/23220/3280	4
hsa05169	Epstein-Barr virus infection	16/702	202/8049	0.695186	0.950413	0.846027	10000/7431/6890/5295/5290/3725/3654/3280/3135/3126/2923/956/894/890/836/567	16
hsa00053	Ascorbate and aldarate metabolism	2/702	27/8049	0.695843	0.950413	0.846027	55586/7364	2
hsa04660	T cell receptor signaling pathway	8/702	104/8049	0.696766	0.950413	0.846027	57144/10000/5604/5295/5290/5063/3725/2353	8
hsa04912	GnRH signaling pathway	7/702	93/8049	0.712912	0.955758	0.850785	5604/5338/5332/3725/1958/817/775	7
hsa04970	Salivary secretion	7/702	93/8049	0.712912	0.955758	0.850785	727897/6779/5542/5332/1755/491/276	7
hsa04137	Mitophagy - animal	5/702	68/8049	0.718731	0.955758	0.850785	55288/22808/22800/3725/664	5
hsa04664	Fc epsilon RI signaling pathway	5/702	68/8049	0.718731	0.955758	0.850785	10000/9846/5604/5295/5290	5
hsa05223	Non-small cell lung cancer	5/702	68/8049	0.718731	0.955758	0.850785	10000/5604/5295/5290/2064	5
hsa05130	Pathogenic Escherichia coli infection	15/702	193/8049	0.719124	0.955758	0.850785	51807/10382/9266/9076/9073/8797/5063/4645/4629/3725/3654/2768/2597/2353/836	15
hsa04924	Renin secretion	5/702	69/8049	0.730715	0.966161	0.860045	5732/5332/1908/1636/775	5
hsa00591	Linoleic acid metabolism	2/702	29/8049	0.733164	0.966161	0.860045	5322/1576	2
hsa05164	Influenza A	13/702	171/8049	0.739076	0.969842	0.863322	91543/56649/10000/9021/8797/7416/7113/5604/5295/5290/3126/2224/836	13
hsa05120	Epithelial cell signaling in Helicobacter pylori infection	5/702	70/8049	0.742325	0.970013	0.863474	5803/3725/1445/836/525	5
hsa04611	Platelet activation	9/702	124/8049	0.765151	0.984203	0.876105	83660/10000/5906/5590/5501/5332/5295/5290/2266	9
hsa01523	Antifolate resistance	2/702	31/8049	0.766518	0.984203	0.876105	2352/2348	2
hsa04370	VEGF signaling pathway	4/702	59/8049	0.768743	0.984203	0.876105	10000/5604/5295/5290	4
hsa04932	Non-alcoholic fatty liver disease	11/702	150/8049	0.769602	0.984203	0.876105	51085/10000/9021/5295/5290/4715/3725/3667/3643/2353/836	11
hsa04640	Hematopoietic cell lineage	7/702	99/8049	0.771787	0.984203	0.876105	100133941/4254/3675/3126/1440/966/928	7
hsa05145	Toxoplasmosis	8/702	112/8049	0.772172	0.984203	0.876105	22798/10000/7042/4843/3909/3654/3126/836	8
hsa03050	Proteasome	3/702	46/8049	0.777722	0.98723	0.8788	5721/5683/5682	3
hsa00910	Nitrogen metabolism	1/702	17/8049	0.78838	0.993091	0.884017	768	1
hsa00310	Lysine degradation	4/702	61/8049	0.791036	0.993091	0.884017	93166/85007/5351/39	4
hsa04918	Thyroid hormone synthesis	5/702	75/8049	0.794857	0.993091	0.884017	405753/50506/5332/3309/2878	5
hsa04080	Neuroactive ligand-receptor interaction	26/702	341/8049	0.795111	0.993091	0.884017	255061/59350/23566/9568/5733/5732/5618/4922/4887/4543/2908/2897/2895/2834/2742/2564/2560/2550/2492/1908/1816/1132/718/552/151/150	26
hsa05235	PD-L1 expression and PD-1 checkpoint pathway in cancer	6/702	89/8049	0.800021	0.995226	0.885918	10000/5604/5295/5290/3725/2353	6
hsa00511	Other glycan degradation	1/702	18/8049	0.806876	0.996277	0.886853	3074	1
hsa05010	Alzheimer disease	28/702	369/8049	0.810485	0.996277	0.886853	147700/51807/10476/10382/10000/8471/8322/7855/7482/7474/7416/5683/5682/5604/5332/5295/5290/4843/4715/4041/4040/4023/3667/3643/2597/836/775/322	28
hsa05030	Cocaine addiction	3/702	49/8049	0.813202	0.996277	0.886853	4129/3725/2354	3
hsa04620	Toll-like receptor signaling pathway	7/702	104/8049	0.813679	0.996277	0.886853	10000/5604/5295/5290/3725/3654/2353	7
hsa05032	Morphine addiction	6/702	91/8049	0.816886	0.996281	0.886857	54331/9568/3763/2564/2560/2550	6
hsa04340	Hedgehog signaling pathway	3/702	50/8049	0.823913	1	0.890167	374654/6608/894	3
hsa05321	Inflammatory bowel disease	4/702	65/8049	0.830432	1	0.890167	7042/6095/3725/3126	4
hsa05017	Spinocerebellar ataxia	9/702	133/8049	0.831289	1	0.890167	10000/7436/7222/6095/5683/5682/5332/5295/5290	9
hsa00670	One carbon pool by folate	1/702	20/8049	0.839165	1	0.890167	10840	1
hsa04062	Chemokine signaling pathway	13/702	189/8049	0.851799	1	0.890167	729230/653361/54331/53358/10000/9547/6372/5906/5604/5590/5332/5295/5290	13
hsa05167	Kaposi sarcoma-associated herpesvirus infection	13/702	189/8049	0.851799	1	0.890167	54331/10000/7538/5604/5295/5290/5155/3725/3135/2353/1827/836/718	13
hsa05330	Allograft rejection	2/702	38/8049	0.856208	1	0.890167	3135/3126	2
hsa00513	Various types of N-glycan biosynthesis	2/702	39/8049	0.866084	1	0.890167	11320/3074	2
hsa05162	Measles	9/702	139/8049	0.866712	1	0.890167	10332/10000/5295/5290/3725/3654/2353/894/836	9
hsa04614	Renin-angiotensin system	1/702	23/8049	0.877775	1	0.890167	1636	1
hsa05134	Legionellosis	3/702	57/8049	0.885108	1	0.890167	836/718/664	3
hsa05160	Hepatitis C	10/702	157/8049	0.888663	1	0.890167	91543/10000/9076/9073/9021/5604/5295/5290/949/836	10
hsa05135	Yersinia infection	8/702	130/8049	0.890296	1	0.890167	10000/5604/5295/5290/3725/3654/2353/2335	8
hsa05332	Graft-versus-host disease	2/702	42/8049	0.892091	1	0.890167	3135/3126	2
hsa04650	Natural killer cell mediated cytotoxicity	8/702	131/8049	0.895	1	0.890167	53358/8797/5604/5295/5290/3135/2215/836	8
hsa04217	Necroptosis	10/702	159/8049	0.897263	1	0.890167	55506/8969/8797/8335/8331/7416/5837/5836/5478/817	10
hsa04940	Type I diabetes mellitus	2/702	43/8049	0.899663	1	0.890167	3135/3126	2
hsa04971	Gastric acid secretion	4/702	76/8049	0.908056	1	0.890167	5332/3784/1080/817	4
hsa04723	Retrograde endocannabinoid signaling	9/702	148/8049	0.908354	1	0.890167	57030/54331/22999/5332/4715/3763/2564/2560/775	9
hsa04966	Collecting duct acid secretion	1/702	27/8049	0.915253	1	0.890167	525	1
hsa05152	Tuberculosis	11/702	180/8049	0.923674	1	0.890167	10332/10000/9902/7042/4843/3654/3126/2215/836/817/718	11
hsa00600	Sphingolipid metabolism	2/702	47/8049	0.925256	1	0.890167	79603/2581	2
hsa05163	Human cytomegalovirus infection	14/702	225/8049	0.934698	1	0.890167	54331/10000/6890/5733/5732/5604/5332/5295/5290/3135/2923/2768/836/567	14
hsa00410	beta-Alanine metabolism	1/702	30/8049	0.935613	1	0.890167	18	1
hsa00565	Ether lipid metabolism	2/702	49/8049	0.935614	1	0.890167	5338/5322	2
hsa04672	Intestinal immune network for IgA production	2/702	49/8049	0.935614	1	0.890167	5284/3126	2
hsa04142	Lysosome	7/702	128/8049	0.937986	1	0.890167	3423/3074/2760/2581/1515/1174/1075	7
hsa04060	Cytokine-cytokine receptor interaction	19/702	294/8049	0.938757	1	0.890167	729230/338376/57007/55801/55504/9547/8797/8600/7292/7042/6372/5618/4982/3623/3556/1489/1440/651/268	19
hsa05310	Asthma	1/702	31/8049	0.94125	1	0.890167	3126	1
hsa04061	Viral protein interaction with cytokine and cytokine receptor	5/702	100/8049	0.944082	1	0.890167	729230/57007/9547/8797/6372	5
hsa04961	Endocrine and other factor-regulated calcium reabsorption	2/702	53/8049	0.952388	1	0.890167	5332/491	2
hsa05320	Autoimmune thyroid disease	2/702	53/8049	0.952388	1	0.890167	3135/3126	2
hsa05012	Parkinson disease	15/702	249/8049	0.95622	1	0.890167	147700/51807/10476/10382/9246/7416/7345/5683/5682/4715/4129/3309/1843/836/817	15
hsa04659	Th17 cell differentiation	5/702	107/8049	0.962621	1	0.890167	6095/3725/3556/3126/2353	5
hsa04658	Th1 and Th2 cell differentiation	4/702	92/8049	0.965151	1	0.890167	84441/3725/3126/2353	4
hsa04120	Ubiquitin mediated proteolysis	7/702	140/8049	0.96653	1	0.890167	148581/134111/27338/11065/9246/9021/991	7
hsa05340	Primary immunodeficiency	1/702	38/8049	0.969072	1	0.890167	6890	1
hsa03440	Homologous recombination	1/702	41/8049	0.976512	1	0.890167	5425	1
hsa05168	Herpes simplex virus 1 infection	31/702	490/8049	0.981862	1	0.890167	729747/353355/255403/162962/146434/93134/80818/55786/55769/55422/10794/10224/10000/9021/8892/7757/7743/7738/7639/7594/6890/5501/5295/5290/3654/3135/3126/2923/836/718/567	31
hsa00970	Aminoacyl-tRNA biosynthesis	2/702	66/8049	0.982614	1	0.890167	8565/1615	2
hsa04622	RIG-I-like receptor signaling pathway	2/702	70/8049	0.987334	1	0.890167	338376/64343	2
hsa03015	mRNA surveillance pathway	3/702	97/8049	0.992695	1	0.890167	5526/5501/4440	3
hsa03460	Fanconi anemia pathway	1/702	54/8049	0.99288	1	0.890167	3280	1
hsa04064	NF-kappa B signaling pathway	3/702	104/8049	0.995656	1	0.890167	8600/7412/3654	3
hsa04621	NOD-like receptor signaling pathway	7/702	181/8049	0.996838	1	0.890167	118429/115362/7416/5332/3725/1668/846	7
hsa04141	Protein processing in endoplasmic reticulum	6/702	167/8049	0.997425	1	0.890167	30001/10134/10130/5034/3309/2923	6
hsa03008	Ribosome biogenesis in eukaryotes	3/702	111/8049	0.997437	1	0.890167	345630/81691/23160	3
hsa00190	Oxidative phosphorylation	3/702	133/8049	0.999533	1	0.890167	10476/4715/525	3
hsa04144	Endocytosis	9/702	248/8049	0.999583	1	0.890167	23096/9266/6457/5867/5590/5338/3135/2352/2348	9
hsa05014	Amyotrophic lateral sclerosis	16/702	364/8049	0.999611	1	0.890167	147700/51807/10476/10382/10280/7416/5683/5682/4843/4715/3309/3084/2878/847/836/283	16
hsa05016	Huntington disease	12/702	306/8049	0.999731	1	0.890167	147700/51807/10476/10382/7416/6648/5683/5682/5332/4715/2878/836	12
hsa04714	Thermogenesis	7/702	231/8049	0.999879	1	0.890167	51287/10476/8110/6601/4879/4715/2180	7
hsa03010	Ribosome	3/702	158/8049	0.999937	1	0.890167	200916/29093/28998	3
hsa03013	RNA transport	3/702	186/8049	0.999994	1	0.890167	57510/11260/8892	3
hsa03040	Spliceosome	1/702	151/8049	0.999999	1	0.890167	56259	1
hsa04740	Olfactory transduction	14/702	448/8049	1	1	0.890167	441933/392309/390066/255725/254973/219874/128371/83988/79541/26716/26664/26531/26211/817	14

## Sheet: lncRNA_KEGG
ID	Description	GeneRatio	BgRatio	pvalue	p.adjust	qvalue	geneID	Count
hsa04066	HIF-1 signaling pathway	18/486	109/8049	8.16335e-05	0.0231434	0.021177	10000/8453/6513/5604/5295/5230/5214/5163/4843/3945/3939/3643/2597/2064/2026/2023/817/230	18
hsa00010	Glycolysis / Gluconeogenesis	13/486	67/8049	0.000151264	0.0231434	0.021177	9562/7167/5230/5223/5214/3945/3939/2821/2597/2026/2023/1737/230	13
hsa00051	Fructose and mannose metabolism	8/486	33/8049	0.000604311	0.0384358	0.03517	29925/7167/6652/5214/4351/2762/231/230	8
hsa04931	Insulin resistance	16/486	108/8049	0.000707832	0.0384358	0.03517	200186/51085/27330/10000/9882/6945/6513/5837/5781/5590/5501/5295/3667/3643/2308/1374	16
hsa05211	Renal cell carcinoma	12/486	69/8049	0.000768399	0.0384358	0.03517	10000/8453/7042/6513/5906/5781/5604/5295/5063/5058/3725/2113	12
hsa05230	Central carbon metabolism in cancer	12/486	70/8049	0.000877797	0.0384358	0.03517	10000/8140/6513/5604/5295/5223/5214/5163/3945/3939/3417/2064	12
hsa00100	Steroid biosynthesis	6/486	20/8049	0.00087925	0.0384358	0.03517	51478/50814/10682/4047/1717/1595	6
hsa01230	Biosynthesis of amino acids	12/486	74/8049	0.00145368	0.0518786	0.0474706	7167/5230/5223/5214/3417/2806/2597/2026/2023/384/230/48	12
hsa00900	Terpenoid backbone biosynthesis	6/486	22/8049	0.00152644	0.0518786	0.0474706	57107/51449/23590/4598/2224/39	6
hsa01200	Carbon metabolism	16/486	117/8049	0.00169538	0.0518786	0.0474706	7167/5230/5223/5214/4329/3417/2821/2806/2597/2026/2023/1737/847/230/48/39	16
hsa05224	Breast cancer	18/486	147/8049	0.00315328	0.0877185	0.0802653	26508/10000/8600/8322/7855/7482/7474/5604/5295/4041/4040/3725/3280/2353/2100/2064/672/182	18
hsa01040	Biosynthesis of unsaturated fatty acids	6/486	27/8049	0.00468287	0.119413	0.109267	79071/51144/9524/9415/6319/3992	6
hsa04150	mTOR signaling pathway	18/486	155/8049	0.00555408	0.130735	0.119626	64798/54541/51719/27330/10000/9706/8322/8140/7855/7482/7474/6446/5604/5295/4041/4040/3667/3643	18
hsa01212	Fatty acid metabolism	9/486	57/8049	0.00665021	0.143588	0.131387	79071/51144/9524/9415/6319/5538/3992/1374/39	9
hsa00520	Amino sugar and nucleotide sugar metabolism	8/486	48/8049	0.0074128	0.143588	0.131387	51700/51167/29925/10007/4351/3074/2821/2762	8
hsa03018	RNA degradation	11/486	79/8049	0.00750785	0.143588	0.131387	196513/80349/25904/11340/10200/10140/9924/7832/5214/2026/2023	11
hsa00603	Glycosphingolipid biosynthesis - globo and isoglobo series	4/486	15/8049	0.0105075	0.185743	0.169961	10317/8706/6489/3074	4
hsa04922	Glucagon signaling pathway	13/486	106/8049	0.0110973	0.185743	0.169961	200186/150094/10000/6513/5837/5223/5214/3945/3939/3708/2308/1374/817	13
hsa05205	Proteoglycans in cancer	21/486	205/8049	0.0119351	0.185743	0.169961	22808/22800/10000/8322/7855/7482/7474/7042/6608/6383/5781/5604/5501/5295/5058/4660/3708/3693/3481/2064/817	21
hsa04218	Cellular senescence	17/486	156/8049	0.012768	0.185743	0.169961	22808/22800/10114/10000/7416/7042/5604/5501/5481/5295/3708/3135/2308/2113/1111/1017/894	17
hsa04360	Axon guidance	19/486	181/8049	0.0128217	0.185743	0.169961	84612/64221/64218/54961/23380/8829/8482/7474/7222/6608/6259/5781/5590/5295/5163/5063/5058/1073/817	19
hsa00730	Thiamine metabolism	4/486	16/8049	0.0133541	0.185743	0.169961	122481/27010/205/204	4
hsa00640	Propanoate metabolism	6/486	34/8049	0.0148879	0.198073	0.181244	79611/4329/3945/3939/39/18	6
hsa05165	Human papillomavirus infection	30/486	331/8049	0.0162638	0.201013	0.183934	84612/84441/26508/10474/10134/10000/8322/7855/7482/7474/7283/7148/5604/5590/5529/5526/5295/3993/3693/3680/3280/3135/3065/2308/1292/1286/1285/1017/894/182	30
hsa04210	Apoptosis	15/486	136/8049	0.0168678	0.201013	0.183934	153090/51807/10000/9131/8797/5783/5604/5366/5295/4217/3725/3708/2353/1522/1075	15
hsa00760	Nicotinate and nicotinamide metabolism	6/486	35/8049	0.0170795	0.201013	0.183934	84618/23530/23475/5169/4837/316	6
hsa04140	Autophagy - animal	15/486	137/8049	0.017931	0.203218	0.185951	440275/64798/55626/54541/22808/22800/10000/9706/7405/5604/5295/5289/3708/3667/664	15
hsa04510	Focal adhesion	20/486	201/8049	0.0186512	0.20383	0.186512	83660/10000/7148/5906/5604/5501/5295/5228/5063/5058/4660/3725/3693/3680/2064/1793/1292/1286/1285/894	20
hsa00601	Glycosphingolipid biosynthesis - lacto and neolacto series	5/486	27/8049	0.0210199	0.221796	0.202951	79369/10317/8706/6489/6487	5
hsa05166	Human T-cell leukemia virus 1 infection	21/486	219/8049	0.0234824	0.230075	0.210526	200186/83660/10000/8829/7416/7042/6513/5901/5604/5295/3725/3135/2353/2224/2113/1959/1111/1031/1017/894/821	21
hsa04917	Prolactin signaling pathway	9/486	70/8049	0.0241391	0.230075	0.210526	10000/8835/8600/5618/5604/5295/2353/2100/894	9
hsa00230	Purine metabolism	14/486	130/8049	0.0247268	0.230075	0.210526	122481/84618/11164/10606/9060/8833/5169/5151/4830/3615/1716/353/205/204	14
hsa05225	Hepatocellular carcinoma	17/486	168/8049	0.024812	0.230075	0.210526	29117/10000/8322/7855/7482/7474/7042/6601/6595/5604/5295/4257/4041/4040/3481/2948/1728	17
hsa04068	FoxO signaling pathway	14/486	131/8049	0.0262186	0.235968	0.215918	10000/9455/7042/6648/6446/5604/5295/3667/3643/2308/1017/894/847/664	14
hsa00513	Various types of N-glycan biosynthesis	6/486	39/8049	0.0280481	0.245221	0.224385	11320/10195/6487/3703/3074/1603	6
hsa01524	Platinum drug resistance	9/486	73/8049	0.0307732	0.261573	0.239347	10000/5366/5295/4257/4217/2948/2064/1317/672	9
hsa04213	Longevity regulating pathway - multiple species	8/486	62/8049	0.0319314	0.264081	0.241643	10000/6648/5295/3667/3643/3065/2308/847	8
hsa04141	Protein processing in endoplasmic reticulum	16/486	167/8049	0.0444937	0.358291	0.327848	440275/258010/27102/23645/10970/10134/10130/8720/5034/4217/3998/3703/3309/2923/1603/821	16
hsa00533	Glycosaminoglycan biosynthesis - keratan sulfate	3/486	14/8049	0.0483868	0.370976	0.339455	93010/8534/6487	3
hsa04625	C-type lectin receptor signaling pathway	11/486	104/8049	0.0484936	0.370976	0.339455	22808/22800/10332/10000/5781/5295/5058/3725/3708/1960/1959	11
hsa04152	AMPK signaling pathway	12/486	120/8049	0.0578446	0.420269	0.38456	200186/51719/10000/6319/5529/5526/5295/5214/3667/3643/2308/1374	12
hsa00604	Glycosphingolipid biosynthesis - ganglio series	3/486	15/8049	0.0578566	0.420269	0.38456	30815/6489/3074	3
hsa04310	Wnt signaling pathway	15/486	160/8049	0.0590574	0.420269	0.38456	144165/84133/57216/8607/8322/7855/7482/7474/6259/4041/4040/3725/2239/894/817	15
hsa04146	Peroxisome	9/486	83/8049	0.0617699	0.429582	0.393081	54677/8528/6648/5826/5052/4843/4598/3417/847	9
hsa00280	Valine, leucine and isoleucine degradation	6/486	48/8049	0.0672587	0.457359	0.418499	65985/64087/4329/316/39/18	6
hsa04960	Aldosterone-regulated sodium reabsorption	5/486	37/8049	0.0696224	0.463141	0.423789	6446/5295/4306/3667/3643	5
hsa04668	TNF signaling pathway	11/486	112/8049	0.0746938	0.486304	0.444984	153090/10000/9530/5604/5295/4217/3726/3725/2353/1326/182	11
hsa00062	Fatty acid elongation	4/486	27/8049	0.0765843	0.488225	0.446742	79071/51144/9524/5538	4
hsa00510	N-Glycan biosynthesis	6/486	50/8049	0.078877	0.490099	0.448457	84620/11320/10195/4249/3703/1603	6
hsa04010	MAPK signaling pathway	24/486	294/8049	0.0800815	0.490099	0.448457	27330/25780/22808/22800/10000/8550/7042/5906/5604/5495/5228/5058/4217/3725/3654/3643/3481/3164/2353/2064/1843/1326/784/783	24
hsa04934	Cushing syndrome	14/486	155/8049	0.0847145	0.501891	0.459246	57552/8322/7855/7482/7474/5906/5604/5151/3708/3164/1583/1031/1017/817	14
hsa00650	Butanoate metabolism	4/486	28/8049	0.0852886	0.501891	0.459246	65985/6296/39/18	4
hsa05170	Human immunodeficiency virus 1 infection	18/486	212/8049	0.089314	0.510678	0.467287	60489/54331/25939/10000/8450/5604/5295/5063/5058/3725/3708/3654/3135/2923/2353/1174/1111/1073	18
hsa01210	2-Oxocarboxylic acid metabolism	3/486	18/8049	0.0909079	0.510678	0.467287	3417/2806/48	3
hsa04390	Hippo signaling pathway	14/486	157/8049	0.0917884	0.510678	0.467287	84612/60485/8322/7855/7482/7474/7042/5590/5501/4086/3993/3397/894/268	14
hsa00531	Glycosaminoglycan degradation	3/486	19/8049	0.103332	0.548994	0.502347	3423/3074/2799	3
hsa04722	Neurotrophin signaling pathway	11/486	119/8049	0.10383	0.548994	0.502347	27330/10000/5906/5781/5604/5295/4217/3725/3667/3654/817	11
hsa00020	Citrate cycle (TCA cycle)	4/486	30/8049	0.104058	0.548994	0.502347	3417/1737/48/47	4
hsa04720	Long-term potentiation	7/486	67/8049	0.108026	0.560268	0.512663	27330/5906/5604/5502/5501/3708/817	7
hsa05226	Gastric cancer	13/486	149/8049	0.115087	0.58382	0.534214	10000/8322/7855/7482/7474/7042/5604/5295/4041/4040/3728/2064/1017	13
hsa00532	Glycosaminoglycan biosynthesis - chondroitin sulfate / dermatan sulfate	3/486	20/8049	0.116382	0.58382	0.534214	56548/55790/10090	3
hsa00920	Sulfur metabolism	2/486	10/8049	0.118748	0.586077	0.536279	23474/9060	2
hsa05010	Alzheimer disease	28/486	369/8049	0.123129	0.592243	0.541922	147700/55626/51807/10000/9706/8322/7855/7482/7474/7416/7385/5695/5682/5604/5481/5295/5289/4843/4722/4715/4217/4041/4040/3708/3667/3643/2597/322	28
hsa04910	Insulin signaling pathway	12/486	137/8049	0.123868	0.592243	0.541922	10580/10000/8835/5837/5604/5590/5501/5295/3667/3643/3632/2308	12
hsa00220	Arginine biosynthesis	3/486	21/8049	0.130011	0.61205	0.560045	4843/2806/384	3
hsa01522	Endocrine resistance	9/486	98/8049	0.136432	0.632548	0.578802	10000/5604/5295/3725/2353/2100/2064/1031/182	9
hsa04012	ErbB signaling pathway	8/486	85/8049	0.139948	0.636494	0.582413	10000/5604/5295/5063/5058/3725/2064/817	8
hsa04930	Type II diabetes mellitus	5/486	46/8049	0.142269	0.636494	0.582413	8835/5590/5295/3667/3643	5
hsa04933	AGE-RAGE signaling pathway in diabetic complications	9/486	100/8049	0.14891	0.636494	0.582413	10000/7042/5590/5295/5292/3725/2308/1286/1285	9
hsa04114	Oocyte meiosis	11/486	128/8049	0.149794	0.636494	0.582413	132864/27330/22849/5604/5529/5526/5501/3708/1017/817/699	11
hsa00562	Inositol phosphate metabolism	7/486	73/8049	0.150121	0.636494	0.582413	9562/7167/5289/5286/4534/4329/3632	7
hsa04115	p53 signaling pathway	7/486	73/8049	0.150121	0.636494	0.582413	55240/8797/5366/1111/1017/900/894	7
hsa03420	Nucleotide excision repair	5/486	47/8049	0.151843	0.636494	0.582413	56655/8450/6117/5425/1069	5
hsa04550	Signaling pathways regulating pluripotency of stem cells	12/486	143/8049	0.15448	0.638796	0.584519	10000/9869/8322/7855/7482/7474/5604/5295/4093/4086/3399/3397	12
hsa00515	Mannose type O-glycan biosynthesis	3/486	23/8049	0.158802	0.639388	0.585061	148789/9486/6487	3
hsa03060	Protein export	3/486	23/8049	0.158802	0.639388	0.585061	58477/28972/3309	3
hsa04211	Longevity regulating pathway	8/486	89/8049	0.167954	0.658194	0.602269	10000/9365/6648/5295/3667/3643/2308/847	8
hsa03030	DNA replication	4/486	36/8049	0.169946	0.658194	0.602269	56655/6117/5425/4174	4
hsa00270	Cysteine and methionine metabolism	5/486	49/8049	0.171763	0.658194	0.602269	3945/3939/2806/1788/1036	5
hsa04151	PI3K-Akt signaling pathway	26/486	354/8049	0.172077	0.658194	0.602269	200186/54541/54331/23566/10000/7148/6446/5618/5604/5529/5526/5295/5228/3693/3680/3667/3643/3481/3164/2064/1292/1286/1285/1017/894/672	26
hsa05217	Basal cell carcinoma	6/486	63/8049	0.178656	0.663306	0.606946	374654/8322/7855/7482/7474/6608	6
hsa05017	Spinocerebellar ataxia	11/486	133/8049	0.179219	0.663306	0.606946	55626/10000/9706/7436/7222/5695/5682/5295/5289/4217/3708	11
hsa03320	PPAR signaling pathway	7/486	77/8049	0.181852	0.663306	0.606946	440503/10580/9415/6319/2170/1374/123	7
hsa00330	Arginine and proline metabolism	5/486	50/8049	0.182084	0.663306	0.606946	8974/5033/4843/2806/384	5
hsa04919	Thyroid hormone signaling pathway	10/486	121/8049	0.194464	0.692547	0.633703	10000/9968/9882/6513/5604/5295/5214/3065/2308/1827	10
hsa04932	Non-alcoholic fatty liver disease	12/486	150/8049	0.194637	0.692547	0.633703	51085/10000/7385/6945/5295/4722/4715/4217/3725/3667/3643/2353	12
hsa00620	Pyruvate metabolism	4/486	39/8049	0.207235	0.728894	0.666962	3945/3939/1737/39	4
hsa04330	Notch signaling pathway	5/486	53/8049	0.214329	0.740304	0.677402	84441/26508/3280/3065/182	5
hsa05221	Acute myeloid leukemia	6/486	67/8049	0.21651	0.740304	0.677402	10000/7704/5604/5295/5292/3728	6
hsa05418	Fluid shear stress and atherosclerosis	11/486	139/8049	0.217798	0.740304	0.677402	10000/6383/5590/5295/4257/4217/3725/2948/2353/1843/1728	11
hsa05020	Prion diseases	4/486	40/8049	0.220156	0.740304	0.677402	5604/3309/730/727	4
hsa04216	Ferroptosis	4/486	41/8049	0.233284	0.767863	0.70262	84557/55240/30061/8031	4
hsa05031	Amphetamine addiction	6/486	69/8049	0.236387	0.767863	0.70262	5501/3725/3065/2354/2353/817	6
hsa05231	Choline metabolism in cancer	8/486	98/8049	0.239048	0.767863	0.70262	204962/10000/5604/5295/5130/3725/2353/1606	8
hsa04142	Lysosome	10/486	128/8049	0.244196	0.767863	0.70262	5538/3423/3074/2799/2760/2581/2519/1522/1174/1075	10
hsa00380	Tryptophan metabolism	4/486	42/8049	0.246596	0.767863	0.70262	64577/847/316/39	4
hsa04914	Progesterone-mediated oocyte maturation	8/486	99/8049	0.247527	0.767863	0.70262	132864/27330/22849/10000/5604/5295/1017/699	8
hsa04926	Relaxin signaling pathway	10/486	129/8049	0.251652	0.767863	0.70262	54331/10000/5604/5590/5295/4843/3725/2353/1286/1285	10
hsa04392	Hippo signaling pathway - multiple species	3/486	29/8049	0.253955	0.767863	0.70262	60485/8642/5058	3
hsa04520	Adherens junction	6/486	71/8049	0.256795	0.767863	0.70262	117178/10580/9855/5797/3643/2064	6
hsa00240	Pyrimidine metabolism	5/486	57/8049	0.259793	0.767863	0.70262	84618/54963/5169/4830/1635	5
hsa00480	Glutathione metabolism	5/486	57/8049	0.259793	0.767863	0.70262	79017/9588/4257/3417/2948	5
hsa05210	Colorectal cancer	7/486	86/8049	0.261861	0.767863	0.70262	10000/7042/5604/5366/5295/3725/2353	7
hsa00400	Phenylalanine, tyrosine and tryptophan biosynthesis	1/486	5/8049	0.267637	0.767863	0.70262	2806	1
hsa00030	Pentose phosphate pathway	3/486	30/8049	0.270611	0.767863	0.70262	5214/2821/230	3
hsa00630	Glyoxylate and dicarboxylate metabolism	3/486	30/8049	0.270611	0.767863	0.70262	847/48/39	3
hsa04530	Tight junction	12/486	162/8049	0.272878	0.767863	0.70262	84952/84612/54566/51807/9076/8777/5906/5590/4217/3993/3725/2064	12
hsa05142	Chagas disease	8/486	102/8049	0.27352	0.767863	0.70262	10000/7042/5295/4843/3725/3654/2353/1636	8
hsa05146	Amoebiasis	8/486	102/8049	0.27352	0.767863	0.70262	7042/5295/5269/5052/4843/1286/1285/384	8
hsa04512	ECM-receptor interaction	7/486	88/8049	0.280888	0.775251	0.70938	255743/7148/3693/3680/1292/1286/1285	7
hsa04072	Phospholipase D signaling pathway	11/486	148/8049	0.281218	0.775251	0.70938	55326/23566/22808/22800/10000/9266/5781/5604/5295/3643/1606	11
hsa04660	T cell receptor signaling pathway	8/486	104/8049	0.291257	0.788734	0.721717	10000/5604/5295/5063/5058/3725/2353/1326	8
hsa00511	Other glycan degradation	2/486	18/8049	0.297059	0.788734	0.721717	3074/2519	2
hsa05410	Hypertrophic cardiomyopathy	7/486	90/8049	0.300245	0.788734	0.721717	7171/7042/3693/3680/1636/784/783	7
hsa05132	Salmonella infection	15/486	213/8049	0.305408	0.788734	0.721717	147700/10000/9266/8797/6281/5604/5289/5286/5063/5058/3725/3654/2597/2353/302	15
hsa00561	Glycerolipid metabolism	5/486	61/8049	0.307252	0.788734	0.721717	129642/80339/55326/1606/231	5
hsa05133	Pertussis	6/486	76/8049	0.309625	0.788734	0.721717	4843/3725/3654/2353/1073/727	6
hsa05212	Pancreatic cancer	6/486	76/8049	0.309625	0.788734	0.721717	10000/9459/7042/5604/5295/2064	6
hsa05220	Chronic myeloid leukemia	6/486	76/8049	0.309625	0.788734	0.721717	10000/7042/5781/5604/5295/3065	6
hsa00440	Phosphonate and phosphinate metabolism	1/486	6/8049	0.311885	0.788734	0.721717	5130	1
hsa00750	Vitamin B6 metabolism	1/486	6/8049	0.311885	0.788734	0.721717	316	1
hsa05222	Small cell lung cancer	7/486	92/8049	0.319871	0.792429	0.725098	10000/9618/5295/4843/1286/1285/1017	7
hsa05412	Arrhythmogenic right ventricular cardiomyopathy	6/486	77/8049	0.320423	0.792429	0.725098	3728/3693/3680/1829/784/783	6
hsa03410	Base excision repair	3/486	33/8049	0.321115	0.792429	0.725098	79661/56655/5425	3
hsa04921	Oxytocin signaling pathway	11/486	154/8049	0.326266	0.793494	0.726073	8536/5604/5501/4660/3725/3708/2353/1827/817/784/783	11
hsa04014	Ras signaling pathway	16/486	232/8049	0.326733	0.793494	0.726073	54331/25780/22808/22800/10000/5906/5781/5604/5322/5295/5228/5063/5058/3643/3481/2113	16
hsa05162	Measles	10/486	139/8049	0.32986	0.79478	0.72725	440275/27102/10332/10000/5295/3725/3654/2353/1017/894	10
hsa00040	Pentose and glucuronate interconversions	3/486	34/8049	0.338009	0.796137	0.728492	9365/6652/231	3
hsa04350	TGF-beta signaling pathway	7/486	94/8049	0.339709	0.796137	0.728492	7042/4093/4091/4086/3399/3397/268	7
hsa00983	Drug metabolism - other enzymes	6/486	79/8049	0.342173	0.796137	0.728492	54963/8833/4830/4257/3615/2948	6
hsa00670	One carbon pool by folate	2/486	20/8049	0.342458	0.796137	0.728492	25902/10840	2
hsa04929	GnRH secretion	5/486	64/8049	0.343618	0.796137	0.728492	10000/5604/5295/3708/2100	5
hsa05168	Herpes simplex virus 1 infection	32/486	490/8049	0.346034	0.796137	0.728492	100129842/440275/284370/255403/162963/162962/146434/146198/93134/90987/90649/80818/57232/55786/55422/27102/10794/10224/10000/8892/7743/7738/7711/7639/7569/5781/5501/5295/3654/3135/2923/727	32
hsa00350	Tyrosine metabolism	3/486	35/8049	0.354876	0.803359	0.7351	81889/2806/316	3
hsa04927	Cortisol synthesis and secretion	5/486	65/8049	0.355816	0.803359	0.7351	57552/5151/3708/3164/1583	5
hsa04979	Cholesterol metabolism	4/486	50/8049	0.357059	0.803359	0.7351	57552/9217/7416/341	4
hsa04380	Osteoclast differentiation	9/486	128/8049	0.368013	0.803359	0.7351	10000/8600/7042/5604/5295/3726/3725/2354/2353	9
hsa04070	Phosphatidylinositol signaling system	7/486	97/8049	0.369736	0.803359	0.7351	5295/5289/5286/4534/3708/3632/1606	7
hsa04913	Ovarian steroidogenesis	4/486	51/8049	0.371053	0.803359	0.7351	51478/3643/2492/1583	4
hsa00250	Alanine, aspartate and glutamate metabolism	3/486	36/8049	0.371688	0.803359	0.7351	8528/2806/18	3
hsa00500	Starch and sucrose metabolism	3/486	36/8049	0.371688	0.803359	0.7351	5837/5169/2821	3
hsa04662	B cell receptor signaling pathway	6/486	82/8049	0.375042	0.803359	0.7351	25780/10000/5604/5295/3725/2353	6
hsa05202	Transcriptional misregulation in cancer	13/486	192/8049	0.375426	0.803359	0.7351	8861/8013/7704/7102/6760/5218/5090/4086/3728/3065/2308/1031/894	13
hsa04015	Rap1 signaling pathway	14/486	210/8049	0.390081	0.822713	0.75281	84612/83660/25780/23566/22808/10000/9855/5906/5604/5590/5295/5228/3643/3397	14
hsa04137	Mitophagy - animal	5/486	68/8049	0.392463	0.822713	0.75281	55626/22808/22800/3725/664	5
hsa00740	Riboflavin metabolism	1/486	8/8049	0.392536	0.822713	0.75281	5169	1
hsa04728	Dopaminergic synapse	9/486	132/8049	0.403003	0.836655	0.765566	54331/10000/5529/5526/5501/3708/2353/817/406	9
hsa04920	Adipocytokine signaling pathway	5/486	69/8049	0.404657	0.836655	0.765566	10000/6513/5781/3667/1374	5
hsa03430	Mismatch repair	2/486	23/8049	0.408609	0.839157	0.767856	6117/5425	2
hsa03460	Fanconi anemia pathway	4/486	54/8049	0.412841	0.842195	0.770636	6117/3280/2189/672	4
hsa04810	Regulation of actin cytoskeleton	14/486	214/8049	0.417781	0.846629	0.774693	54961/22808/22800/9459/5604/5501/5295/5063/5058/4660/3693/3680/1793/1073	14
hsa04935	Growth hormone synthesis, secretion and action	8/486	119/8049	0.42983	0.865316	0.791792	10000/8835/5604/5295/3726/3708/3667/2353	8
hsa05012	Parkinson disease	16/486	249/8049	0.43549	0.869391	0.795521	147700/51807/11315/9246/7416/7385/7345/5695/5682/4722/4715/4217/3708/3309/1843/817	16
hsa04620	Toll-like receptor signaling pathway	7/486	104/8049	0.440097	0.869391	0.795521	10000/5604/5295/3725/3654/2353/1326	7
hsa04923	Regulation of lipolysis in adipocytes	4/486	56/8049	0.440378	0.869391	0.795521	10000/5295/3667/3643	4
hsa04371	Apelin signaling pathway	9/486	137/8049	0.446785	0.871154	0.797134	54331/22808/22800/10000/5604/5289/4843/3708/182	9
hsa00592	alpha-Linolenic acid metabolism	2/486	25/8049	0.450874	0.871154	0.797134	9415/5322	2
hsa05235	PD-L1 expression and PD-1 checkpoint pathway in cancer	6/486	89/8049	0.451647	0.871154	0.797134	10000/5781/5604/5295/3725/2353	6
hsa03440	Homologous recombination	3/486	41/8049	0.453993	0.871154	0.797134	6117/5425/672	3
hsa04915	Estrogen signaling pathway	9/486	138/8049	0.455505	0.871154	0.797134	10000/9166/5604/5295/3875/3725/3708/2353/2100	9
hsa04928	Parathyroid hormone synthesis, secretion and action	7/486	106/8049	0.460045	0.873716	0.799478	9365/8600/5604/4041/4040/3708/2353	7
hsa00072	Synthesis and degradation of ketone bodies	1/486	10/8049	0.463752	0.873716	0.799478	39	1
hsa05213	Endometrial cancer	4/486	58/8049	0.467525	0.873716	0.799478	10000/5604/5295/2064	4
hsa00860	Porphyrin and chlorophyll metabolism	3/486	42/8049	0.469947	0.873716	0.799478	326625/124454/3163	3
hsa00790	Folate biosynthesis	2/486	26/8049	0.471356	0.873716	0.799478	55034/231	2
hsa04110	Cell cycle	8/486	124/8049	0.476191	0.873716	0.799478	7042/4174/3065/1111/1031/1017/894/699	8
hsa05214	Glioma	5/486	75/8049	0.476832	0.873716	0.799478	10000/8536/5604/5295/817	5
hsa04978	Mineral absorption	4/486	59/8049	0.480921	0.875964	0.801536	55630/30061/3163/1317	4
hsa04975	Fat digestion and absorption	3/486	43/8049	0.485687	0.87941	0.804689	5322/2806/39	3
hsa04666	Fc gamma R-mediated phagocytosis	6/486	93/8049	0.494551	0.881523	0.806622	10000/5604/5295/5058/4082/1073	6
hsa00130	Ubiquinone and other terpenoid-quinone biosynthesis	1/486	11/8049	0.496171	0.881523	0.806622	1728	1
hsa00430	Taurine and hypotaurine metabolism	1/486	11/8049	0.496171	0.881523	0.806622	1036	1
hsa05140	Leishmaniasis	5/486	77/8049	0.500286	0.881523	0.806622	7042/4843/3725/3654/2353	5
hsa05130	Pathogenic Escherichia coli infection	12/486	193/8049	0.501498	0.881523	0.806622	51807/9266/9076/8797/5781/5063/5058/4645/3725/3654/2597/2353	12
hsa00140	Steroid hormone biosynthesis	4/486	61/8049	0.507302	0.881523	0.806622	51478/51144/3290/1583	4
hsa00310	Lysine degradation	4/486	61/8049	0.507302	0.881523	0.806622	10157/9869/5351/39	4
hsa04612	Antigen processing and presentation	5/486	78/8049	0.511862	0.881523	0.806622	5721/3309/3135/2923/821	5
hsa02010	ABC transporters	3/486	45/8049	0.516471	0.881523	0.806622	10351/10058/5826	3
hsa04630	JAK-STAT signaling pathway	10/486	162/8049	0.518543	0.881523	0.806622	338376/10000/8835/5781/5618/5295/5292/1489/894/316	10
hsa05161	Hepatitis B	10/486	162/8049	0.518543	0.881523	0.806622	10000/7042/5604/5295/3725/3654/2353/1960/1959/1017	10
hsa05414	Dilated cardiomyopathy	6/486	96/8049	0.525978	0.882267	0.807303	7171/7042/3693/3680/784/783	6
hsa04725	Cholinergic synapse	7/486	113/8049	0.528358	0.882267	0.807303	54331/10000/5604/5295/3708/2353/817	7
hsa05135	Yersinia infection	8/486	130/8049	0.530541	0.882267	0.807303	27330/10000/5604/5295/3725/3654/2353/1793	8
hsa03050	Proteasome	3/486	46/8049	0.531488	0.882267	0.807303	5721/5695/5682	3
hsa03015	mRNA surveillance pathway	6/486	97/8049	0.53628	0.882267	0.807303	22794/10767/8732/5529/5526/5501	6
hsa05215	Prostate cancer	6/486	97/8049	0.53628	0.882267	0.807303	10000/5604/5295/2308/2064/1017	6
hsa00514	Other types of O-glycan biosynthesis	3/486	47/8049	0.54624	0.884507	0.809353	84620/29071/6487	3
hsa00564	Glycerophospholipid metabolism	6/486	98/8049	0.546486	0.884507	0.809353	129642/55326/55224/5322/5130/1606	6
hsa00410	beta-Alanine metabolism	2/486	30/8049	0.548461	0.884507	0.809353	4329/18	2
hsa04261	Adrenergic signaling in cardiomyocytes	9/486	149/8049	0.549204	0.884507	0.809353	10000/7171/5529/5526/5502/5501/817/784/783	9
hsa00052	Galactose metabolism	2/486	31/8049	0.566467	0.902807	0.826098	5214/231	2
hsa03020	RNA polymerase	2/486	31/8049	0.566467	0.902807	0.826098	9533/5433	2
hsa04916	Melanogenesis	6/486	101/8049	0.576483	0.914009	0.836348	8322/7855/7482/7474/5604/817	6
hsa04136	Autophagy - other	2/486	32/8049	0.58395	0.916634	0.83875	9706/5289	2
hsa04071	Sphingolipid signaling pathway	7/486	119/8049	0.58413	0.916634	0.83875	10000/5604/5590/5529/5526/5295/4217	7
hsa04340	Hedgehog signaling pathway	3/486	50/8049	0.588818	0.919276	0.841168	374654/6608/894	3
hsa05223	Non-small cell lung cancer	4/486	68/8049	0.594364	0.923225	0.844781	10000/5604/5295/2064	4
hsa05206	MicroRNAs in cancer	18/486	310/8049	0.604703	0.934542	0.855136	54541/27086/23414/9493/7148/7042/6659/5604/5295/5292/4082/3667/3065/2064/1788/900/894/672	18
hsa04260	Cardiac muscle contraction	5/486	87/8049	0.610344	0.938519	0.858775	84679/7385/7171/784/783	5
hsa04611	Platelet activation	7/486	124/8049	0.628024	0.956139	0.874899	83660/10000/5906/5590/5501/5295/3708	7
hsa00982	Drug metabolism - cytochrome P450	4/486	71/8049	0.628763	0.956139	0.874899	4257/2948/2330/316	4
hsa00360	Phenylalanine metabolism	1/486	16/8049	0.631177	0.956139	0.874899	2806	1
hsa00450	Selenocompound metabolism	1/486	17/8049	0.653491	0.985065	0.901367	9060	1
hsa04024	cAMP signaling pathway	12/486	216/8049	0.660338	0.990395	0.906243	22800/10000/5906/5604/5501/5295/5058/3725/2492/2353/817/268	12
hsa05216	Thyroid cancer	2/486	37/8049	0.6635	0.990395	0.906243	8031/5604	2
hsa04918	Thyroid hormone synthesis	4/486	75/8049	0.671634	0.99767	0.912901	405753/3708/3309/821	4
hsa05169	Epstein-Barr virus infection	11/486	202/8049	0.682845	1	0.915033	79685/10000/5295/3725/3654/3280/3135/3065/2923/1017/894	11
hsa04974	Protein digestion and absorption	5/486	95/8049	0.687438	1	0.915033	206358/1301/1292/1286/1285	5
hsa05203	Viral carcinogenesis	11/486	204/8049	0.695284	1	0.915033	27044/5366/5295/3725/3135/3065/1960/1959/1111/1017/894	11
hsa04370	VEGF signaling pathway	3/486	59/8049	0.700312	1	0.915033	10000/5604/5295	3
hsa01521	EGFR tyrosine kinase inhibitor resistance	4/486	79/8049	0.710973	1	0.915033	10000/5604/5295/2064	4
hsa04730	Long-term depression	3/486	60/8049	0.71116	1	0.915033	5604/3708/2895	3
hsa05167	Kaposi sarcoma-associated herpesvirus infection	10/486	189/8049	0.712866	1	0.915033	54331/10000/5604/5295/5289/3725/3708/3135/2353/1827	10
hsa04925	Aldosterone synthesis and secretion	5/486	98/8049	0.71353	1	0.915033	8536/3708/3164/1583/817	5
hsa04270	Vascular smooth muscle contraction	7/486	135/8049	0.714764	1	0.915033	94274/27094/5604/5501/5322/4660/3708	7
hsa05219	Bladder cancer	2/486	41/8049	0.717953	1	0.915033	5604/2064	2
hsa00770	Pantothenate and CoA biosynthesis	1/486	21/8049	0.730061	1	0.915033	5169	1
hsa00590	Arachidonic acid metabolism	3/486	63/8049	0.741892	1	0.915033	5740/5322/4048	3
hsa04120	Ubiquitin mediated proteolysis	7/486	140/8049	0.749364	1	0.915033	134111/55294/10075/9246/8453/8450/672	7
hsa00071	Fatty acid degradation	2/486	44/8049	0.753769	1	0.915033	1374/39	2
hsa04614	Renin-angiotensin system	1/486	23/8049	0.761756	1	0.915033	1636	1
hsa05016	Huntington disease	16/486	306/8049	0.761962	1	0.915033	147700/55626/51807/9706/7416/7385/6648/5695/5682/5433/5289/4722/4715/4217/3708/3065	16
hsa05152	Tuberculosis	9/486	180/8049	0.767301	1	0.915033	10332/10000/9902/7042/5289/4843/3654/1054/817	9
hsa04911	Insulin secretion	4/486	86/8049	0.771315	1	0.915033	27094/6513/5864/817	4
hsa00534	Glycosaminoglycan biosynthesis - heparan sulfate / heparin	1/486	24/8049	0.776183	1	0.915033	9955	1
hsa04973	Carbohydrate digestion and absorption	2/486	47/8049	0.785596	1	0.915033	10000/5295	2
hsa00830	Retinol metabolism	3/486	68/8049	0.787268	1	0.915033	54884/51109/316	3
hsa04664	Fc epsilon RI signaling pathway	3/486	68/8049	0.787268	1	0.915033	10000/5604/5295	3
hsa04727	GABAergic synapse	4/486	89/8049	0.793962	1	0.915033	66008/54331/5334/18	4
hsa04022	cGMP-PKG signaling pathway	8/486	167/8049	0.798422	1	0.915033	27094/10000/7416/5604/5501/3708/3667/3643	8
hsa05131	Shigellosis	12/486	242/8049	0.800415	1	0.915033	83660/10000/9266/7416/5481/5295/5289/3725/3708/2308/1793/664	12
hsa04976	Bile secretion	4/486	90/8049	0.8011	1	0.915033	57552/9971/6513/6343	4
hsa04950	Maturity onset diabetes of the young	1/486	26/8049	0.802473	1	0.915033	3280	1
hsa05120	Epithelial cell signaling in Helicobacter pylori infection	3/486	70/8049	0.803475	1	0.915033	5781/5058/3725	3
hsa05030	Cocaine addiction	2/486	49/8049	0.804755	1	0.915033	3725/2354	2
hsa03008	Ribosome biogenesis in eukaryotes	5/486	111/8049	0.808614	1	0.915033	345630/23160/10171/5901/1736	5
hsa04650	Natural killer cell mediated cytotoxicity	6/486	131/8049	0.811128	1	0.915033	8797/5781/5604/5295/5058/3135	6
hsa05144	Malaria	2/486	50/8049	0.813753	1	0.915033	7042/6383	2
hsa04658	Th1 and Th2 cell differentiation	4/486	92/8049	0.814775	1	0.915033	84441/3725/2353/182	4
hsa05218	Melanoma	3/486	72/8049	0.818634	1	0.915033	10000/5604/5295	3
hsa04145	Phagosome	7/486	152/8049	0.819936	1	0.915033	51807/10332/9902/5289/3693/3135/821	7
hsa04912	GnRH signaling pathway	4/486	93/8049	0.821319	1	0.915033	5604/3725/3708/817	4
hsa05323	Rheumatoid arthritis	4/486	93/8049	0.821319	1	0.915033	8600/7042/3725/2353	4
hsa05100	Bacterial invasion of epithelial cells	3/486	73/8049	0.825834	1	0.915033	79658/5295/1793	3
hsa04657	IL-17 signaling pathway	4/486	94/8049	0.827671	1	0.915033	9618/3725/2354/2353	4
hsa04714	Thermogenesis	11/486	231/8049	0.832874	1	0.915033	493753/51103/27330/23028/7385/6601/6595/4722/4715/4217/1374	11
hsa00591	Linoleic acid metabolism	1/486	29/8049	0.836242	1	0.915033	5322	1
hsa05014	Amyotrophic lateral sclerosis	18/486	364/8049	0.843862	1	0.915033	147700/55626/51807/10452/10280/9706/9217/7416/7385/5695/5682/5289/4843/4722/4715/4217/3309/847	18
hsa05160	Hepatitis C	7/486	157/8049	0.844357	1	0.915033	440275/27102/10000/9076/5604/5295/1017	7
hsa04713	Circadian entrainment	4/486	97/8049	0.845613	1	0.915033	54331/3708/2353/817	4
hsa00980	Metabolism of xenobiotics by cytochrome P450	3/486	76/8049	0.845985	1	0.915033	4257/3290/2948	3
hsa03010	Ribosome	7/486	158/8049	0.848909	1	0.915033	64983/51373/29093/29074/28998/11222/6128	7
hsa04217	Necroptosis	7/486	159/8049	0.853354	1	0.915033	9131/8797/7416/5837/5481/5478/817	7
hsa04710	Circadian rhythm	1/486	31/8049	0.855489	1	0.915033	406	1
hsa04750	Inflammatory mediator regulation of TRP channels	4/486	100/8049	0.861956	1	0.915033	5501/5295/3708/817	4
hsa00512	Mucin type O-glycan biosynthesis	1/486	32/8049	0.864248	1	0.915033	29071	1
hsa04215	Apoptosis - multiple species	1/486	32/8049	0.864248	1	0.915033	5366	1
hsa05134	Legionellosis	2/486	57/8049	0.866985	1	0.915033	10767/664	2
hsa04972	Pancreatic secretion	4/486	102/8049	0.872012	1	0.915033	6343/5906/5322/3708	4
hsa05204	Chemical carcinogenesis	3/486	82/8049	0.880285	1	0.915033	4257/3290/2948	3
hsa03013	RNA transport	8/486	186/8049	0.881656	1	0.915033	57510/22794/11260/10419/8892/8668/8662/5901	8
hsa05416	Viral myocarditis	2/486	60/8049	0.885209	1	0.915033	3135/1525	2
hsa04062	Chemokine signaling pathway	8/486	189/8049	0.891773	1	0.915033	54331/10000/9547/5906/5604/5590/5295/5058	8
hsa04610	Complement and coagulation cascades	3/486	85/8049	0.89475	1	0.915033	966/730/727	3
hsa05330	Allograft rejection	1/486	38/8049	0.906731	1	0.915033	3135	1
hsa04540	Gap junction	3/486	88/8049	0.907627	1	0.915033	51807/5604/3708	3
hsa05321	Inflammatory bowel disease	2/486	65/8049	0.910527	1	0.915033	7042/3725	2
hsa05145	Toxoplasmosis	4/486	112/8049	0.913333	1	0.915033	10000/7042/4843/3654	4
hsa00260	Glycine, serine and threonine metabolism	1/486	40/8049	0.917705	1	0.915033	5223	1
hsa04670	Leukocyte transendothelial migration	4/486	114/8049	0.920009	1	0.915033	9076/5906/5781/5295	4
hsa04724	Glutamatergic synapse	4/486	114/8049	0.920009	1	0.915033	54331/9455/3708/2897	4
hsa04726	Serotonergic synapse	4/486	115/8049	0.923171	1	0.915033	54331/5604/3708/1843	4
hsa04924	Renin secretion	2/486	69/8049	0.926914	1	0.915033	3708/1636	2
hsa05332	Graft-versus-host disease	1/486	42/8049	0.92739	1	0.915033	3135	1
hsa04940	Type I diabetes mellitus	1/486	43/8049	0.931797	1	0.915033	3135	1
hsa00600	Sphingolipid metabolism	1/486	47/8049	0.946913	1	0.915033	2581	1
hsa04060	Cytokine-cytokine receptor interaction	12/486	294/8049	0.947416	1	0.915033	338376/55504/9547/8797/8600/7292/7042/5618/3623/1489/651/268	12
hsa04971	Gastric acid secretion	2/486	76/8049	0.948988	1	0.915033	3708/817	2
hsa05164	Influenza A	6/486	171/8049	0.951132	1	0.915033	10000/8797/7416/5604/5295/2224	6
hsa04514	Cell adhesion molecules	5/486	149/8049	0.951501	1	0.915033	9076/6383/5797/3680/3135	5
hsa00565	Ether lipid metabolism	1/486	49/8049	0.953166	1	0.915033	5322	1
hsa05110	Vibrio cholerae infection	1/486	50/8049	0.956011	1	0.915033	11014	1
hsa04961	Endocrine and other factor-regulated calcium reabsorption	1/486	53/8049	0.963553	1	0.915033	9365	1
hsa05320	Autoimmune thyroid disease	1/486	53/8049	0.963553	1	0.915033	3135	1
hsa04144	Endocytosis	9/486	248/8049	0.968131	1	0.915033	137492/84612/51534/23096/9266/6457/5867/5590/3135	9
hsa05032	Morphine addiction	2/486	91/8049	0.976862	1	0.915033	54331/5151	2
hsa04623	Cytosolic DNA-sensing pathway	1/486	63/8049	0.980538	1	0.915033	9533	1
hsa04723	Retrograde endocannabinoid signaling	4/486	148/8049	0.981328	1	0.915033	54331/4722/4715/3708	4
hsa05150	Staphylococcus aureus infection	2/486	96/8049	0.982313	1	0.915033	3875/727	2
hsa03040	Spliceosome	4/486	151/8049	0.983695	1	0.915033	56259/25766/10450/9410	4
hsa00970	Aminoacyl-tRNA biosynthesis	1/486	66/8049	0.98388	1	0.915033	124454	1
hsa04020	Calcium signaling pathway	6/486	201/8049	0.984753	1	0.915033	8536/7416/4843/3708/2064/817	6
hsa04640	Hematopoietic cell lineage	2/486	99/8049	0.984962	1	0.915033	100133941/966	2
hsa05163	Human cytomegalovirus infection	7/486	225/8049	0.985217	1	0.915033	54331/10000/5604/5295/3708/3135/2923	7
hsa04061	Viral protein interaction with cytokine and cytokine receptor	2/486	100/8049	0.985756	1	0.915033	9547/8797	2
hsa04622	RIG-I-like receptor signaling pathway	1/486	70/8049	0.987462	1	0.915033	338376	1
hsa04064	NF-kappa B signaling pathway	2/486	104/8049	0.988545	1	0.915033	8600/3654	2
hsa00190	Oxidative phosphorylation	3/486	133/8049	0.988897	1	0.915033	7385/4722/4715	3
hsa05034	Alcoholism	5/486	187/8049	0.990042	1	0.915033	54331/5604/5501/3065/2354	5
hsa04659	Th17 cell differentiation	2/486	107/8049	0.990279	1	0.915033	3725/2353	2
hsa04721	Synaptic vesicle cycle	1/486	78/8049	0.992418	1	0.915033	5864	1
hsa04621	NOD-like receptor signaling pathway	4/486	181/8049	0.996002	1	0.915033	118429/7416/3725/3708	4
hsa04970	Salivary secretion	1/486	93/8049	0.997052	1	0.915033	3708	1
hsa05322	Systemic lupus erythematosus	2/486	136/8049	0.998073	1	0.915033	730/727	2
hsa04080	Neuroactive ligand-receptor interaction	9/486	341/8049	0.999073	1	0.915033	23566/6343/5697/5618/4887/2897/2895/2492/727	9
hsa04740	Olfactory transduction	1/486	448/8049	1	1	0.915033	817	1

## Sheet: miRNA_KEGG
ID	Description	GeneRatio	BgRatio	pvalue	p.adjust	qvalue	geneID	Count
hsa01210	2-Oxocarboxylic acid metabolism	2/32	18/8049	0.0022517	0.171117	0.161086	3417/2806	2
hsa00100	Steroid biosynthesis	2/32	20/8049	0.00278239	0.171117	0.161086	51478/50814	2
hsa04146	Peroxisome	3/32	83/8049	0.00422735	0.173322	0.163161	54677/6648/3417	3
hsa04068	FoxO signaling pathway	3/32	131/8049	0.0148115	0.304821	0.286951	9455/6648/2308	3
hsa00330	Arginine and proline metabolism	2/32	50/8049	0.0166577	0.304821	0.286951	5033/2806	2
hsa04913	Ovarian steroidogenesis	2/32	51/8049	0.0172949	0.304821	0.286951	51478/1583	2
hsa00400	Phenylalanine, tyrosine and tryptophan biosynthesis	1/32	5/8049	0.0197257	0.304821	0.286951	2806	1
hsa00140	Steroid hormone biosynthesis	2/32	61/8049	0.0242205	0.304821	0.286951	51478/1583	2
hsa00561	Glycerolipid metabolism	2/32	61/8049	0.0242205	0.304821	0.286951	1606/231	2
hsa04213	Longevity regulating pathway - multiple species	2/32	62/8049	0.0249665	0.304821	0.286951	6648/2308	2
hsa04927	Cortisol synthesis and secretion	2/32	65/8049	0.0272604	0.304821	0.286951	57552/1583	2
hsa01230	Biosynthesis of amino acids	2/32	74/8049	0.034627	0.354927	0.33412	3417/2806	2
hsa04211	Longevity regulating pathway	2/32	89/8049	0.0483967	0.445032	0.418943	6648/2308	2
hsa05231	Choline metabolism in cancer	2/32	98/8049	0.057467	0.445032	0.418943	3725/1606	2
hsa04933	AGE-RAGE signaling pathway in diabetic complications	2/32	100/8049	0.0595584	0.445032	0.418943	3725/2308	2
hsa00360	Phenylalanine metabolism	1/32	16/8049	0.0618043	0.445032	0.418943	2806	1
hsa04922	Glucagon signaling pathway	2/32	106/8049	0.0659887	0.445032	0.418943	150094/2308	2
hsa01200	Carbon metabolism	2/32	117/8049	0.0783489	0.445032	0.418943	3417/2806	2
hsa00220	Arginine biosynthesis	1/32	21/8049	0.0803475	0.445032	0.418943	2806	1
hsa00790	Folate biosynthesis	1/32	26/8049	0.0985353	0.445032	0.418943	231	1
hsa00062	Fatty acid elongation	1/32	27/8049	0.102131	0.445032	0.418943	79071	1
hsa01040	Biosynthesis of unsaturated fatty acids	1/32	27/8049	0.102131	0.445032	0.418943	79071	1
hsa04915	Estrogen signaling pathway	2/32	138/8049	0.103744	0.445032	0.418943	3875/3725	2
hsa05418	Fluid shear stress and atherosclerosis	2/32	139/8049	0.105005	0.445032	0.418943	3725/1843	2
hsa00650	Butanoate metabolism	1/32	28/8049	0.105712	0.445032	0.418943	65985	1
hsa04120	Ubiquitin mediated proteolysis	2/32	140/8049	0.106271	0.445032	0.418943	9246/672	2
hsa04010	MAPK signaling pathway	3/32	294/8049	0.110118	0.445032	0.418943	5495/3725/1843	3
hsa00020	Citrate cycle (TCA cycle)	1/32	30/8049	0.112834	0.445032	0.418943	3417	1
hsa05224	Breast cancer	2/32	147/8049	0.115247	0.445032	0.418943	3725/672	2
hsa00052	Galactose metabolism	1/32	31/8049	0.116374	0.445032	0.418943	231	1
hsa03040	Spliceosome	2/32	151/8049	0.120464	0.445032	0.418943	56259/9410	2
hsa00051	Fructose and mannose metabolism	1/32	33/8049	0.123414	0.445032	0.418943	231	1
hsa04934	Cushing syndrome	2/32	155/8049	0.12574	0.445032	0.418943	57552/1583	2
hsa00040	Pentose and glucuronate interconversions	1/32	34/8049	0.126913	0.445032	0.418943	231	1
hsa00350	Tyrosine metabolism	1/32	35/8049	0.130399	0.445032	0.418943	2806	1
hsa04310	Wnt signaling pathway	2/32	160/8049	0.132414	0.445032	0.418943	6259/3725	2
hsa00250	Alanine, aspartate and glutamate metabolism	1/32	36/8049	0.133871	0.445032	0.418943	2806	1
hsa03440	Homologous recombination	1/32	41/8049	0.151033	0.485249	0.456802	672	1
hsa00860	Porphyrin and chlorophyll metabolism	1/32	42/8049	0.154425	0.485249	0.456802	326625	1
hsa04975	Fat digestion and absorption	1/32	43/8049	0.157804	0.485249	0.456802	2806	1
hsa02010	ABC transporters	1/32	45/8049	0.164524	0.493572	0.464637	10351	1
hsa00280	Valine, leucine and isoleucine degradation	1/32	48/8049	0.174506	0.494996	0.465978	65985	1
hsa00270	Cysteine and methionine metabolism	1/32	49/8049	0.177807	0.494996	0.465978	2806	1
hsa05030	Cocaine addiction	1/32	49/8049	0.177807	0.494996	0.465978	3725	1
hsa04979	Cholesterol metabolism	1/32	50/8049	0.181096	0.494996	0.465978	57552	1
hsa03460	Fanconi anemia pathway	1/32	54/8049	0.194124	0.505278	0.475657	672	1
hsa00480	Glutathione metabolism	1/32	57/8049	0.203763	0.505278	0.475657	3417	1
hsa01212	Fatty acid metabolism	1/32	57/8049	0.203763	0.505278	0.475657	79071	1
hsa05321	Inflammatory bowel disease	1/32	65/8049	0.228925	0.505278	0.475657	3725	1
hsa00010	Glycolysis / Gluconeogenesis	1/32	67/8049	0.235094	0.505278	0.475657	9562	1
hsa04137	Mitophagy - animal	1/32	68/8049	0.23816	0.505278	0.475657	3725	1
hsa05031	Amphetamine addiction	1/32	69/8049	0.241215	0.505278	0.475657	3725	1
hsa05211	Renal cell carcinoma	1/32	69/8049	0.241215	0.505278	0.475657	3725	1
hsa04917	Prolactin signaling pathway	1/32	70/8049	0.244258	0.505278	0.475657	5618	1
hsa05120	Epithelial cell signaling in Helicobacter pylori infection	1/32	70/8049	0.244258	0.505278	0.475657	3725	1
hsa05230	Central carbon metabolism in cancer	1/32	70/8049	0.244258	0.505278	0.475657	3417	1
hsa05131	Shigellosis	2/32	242/8049	0.25001	0.505278	0.475657	3725/2308	2
hsa00562	Inositol phosphate metabolism	1/32	73/8049	0.253315	0.505278	0.475657	9562	1
hsa01524	Platinum drug resistance	1/32	73/8049	0.253315	0.505278	0.475657	672	1
hsa05012	Parkinson disease	2/32	249/8049	0.260419	0.505278	0.475657	9246/1843	2
hsa05133	Pertussis	1/32	76/8049	0.262267	0.505278	0.475657	3725	1
hsa05140	Leishmaniasis	1/32	77/8049	0.265228	0.505278	0.475657	3725	1
hsa03018	RNA degradation	1/32	79/8049	0.271116	0.505278	0.475657	11340	1
hsa04662	B cell receptor signaling pathway	1/32	82/8049	0.279861	0.505278	0.475657	3725	1
hsa04012	ErbB signaling pathway	1/32	85/8049	0.288505	0.505278	0.475657	3725	1
hsa05210	Colorectal cancer	1/32	86/8049	0.291364	0.505278	0.475657	3725	1
hsa04727	GABAergic synapse	1/32	89/8049	0.299874	0.505278	0.475657	5334	1
hsa05235	PD-L1 expression and PD-1 checkpoint pathway in cancer	1/32	89/8049	0.299874	0.505278	0.475657	3725	1
hsa04976	Bile secretion	1/32	90/8049	0.302688	0.505278	0.475657	57552	1
hsa04658	Th1 and Th2 cell differentiation	1/32	92/8049	0.308284	0.505278	0.475657	3725	1
hsa04912	GnRH signaling pathway	1/32	93/8049	0.311066	0.505278	0.475657	3725	1
hsa05323	Rheumatoid arthritis	1/32	93/8049	0.311066	0.505278	0.475657	3725	1
hsa04657	IL-17 signaling pathway	1/32	94/8049	0.313837	0.505278	0.475657	3725	1
hsa05150	Staphylococcus aureus infection	1/32	96/8049	0.319347	0.505278	0.475657	3875	1
hsa04070	Phosphatidylinositol signaling system	1/32	97/8049	0.322086	0.505278	0.475657	1606	1
hsa05215	Prostate cancer	1/32	97/8049	0.322086	0.505278	0.475657	2308	1
hsa00564	Glycerophospholipid metabolism	1/32	98/8049	0.324814	0.505278	0.475657	1606	1
hsa01522	Endocrine resistance	1/32	98/8049	0.324814	0.505278	0.475657	3725	1
hsa04925	Aldosterone synthesis and secretion	1/32	98/8049	0.324814	0.505278	0.475657	1583	1
hsa05142	Chagas disease	1/32	102/8049	0.33562	0.505278	0.475657	3725	1
hsa04620	Toll-like receptor signaling pathway	1/32	104/8049	0.34096	0.505278	0.475657	3725	1
hsa04625	C-type lectin receptor signaling pathway	1/32	104/8049	0.34096	0.505278	0.475657	3725	1
hsa04660	T cell receptor signaling pathway	1/32	104/8049	0.34096	0.505278	0.475657	3725	1
hsa04659	Th17 cell differentiation	1/32	107/8049	0.348892	0.508663	0.478845	3725	1
hsa04931	Insulin resistance	1/32	108/8049	0.351515	0.508663	0.478845	2308	1
hsa03008	Ribosome biogenesis in eukaryotes	1/32	111/8049	0.359324	0.510789	0.480845	10171	1
hsa04668	TNF signaling pathway	1/32	112/8049	0.361907	0.510789	0.480845	3725	1
hsa04724	Glutamatergic synapse	1/32	114/8049	0.367042	0.510789	0.480845	9455	1
hsa04726	Serotonergic synapse	1/32	115/8049	0.369595	0.510789	0.480845	1843	1
hsa04722	Neurotrophin signaling pathway	1/32	119/8049	0.379706	0.51433	0.484179	3725	1
hsa04152	AMPK signaling pathway	1/32	120/8049	0.382209	0.51433	0.484179	2308	1
hsa04919	Thyroid hormone signaling pathway	1/32	121/8049	0.384702	0.51433	0.484179	2308	1
hsa04380	Osteoclast differentiation	1/32	128/8049	0.401884	0.526579	0.49571	3725	1
hsa04926	Relaxin signaling pathway	1/32	129/8049	0.404301	0.526579	0.49571	3725	1
hsa05135	Yersinia infection	1/32	130/8049	0.406708	0.526579	0.49571	3725	1
hsa04151	PI3K-Akt signaling pathway	2/32	354/8049	0.414111	0.53058	0.499476	5618/672	2
hsa04210	Apoptosis	1/32	136/8049	0.420952	0.531277	0.500132	3725	1
hsa04910	Insulin signaling pathway	1/32	137/8049	0.423294	0.531277	0.500132	2308	1
hsa05162	Measles	1/32	139/8049	0.42795	0.531695	0.500526	3725	1
hsa04072	Phospholipase D signaling pathway	1/32	148/8049	0.448454	0.551567	0.519233	1606	1
hsa04932	Non-alcoholic fatty liver disease	1/32	150/8049	0.452913	0.551567	0.519233	3725	1
hsa04921	Oxytocin signaling pathway	1/32	154/8049	0.461726	0.555753	0.523174	3725	1
hsa04218	Cellular senescence	1/32	156/8049	0.466081	0.555753	0.523174	2308	1
hsa04530	Tight junction	1/32	162/8049	0.478942	0.555753	0.523174	3725	1
hsa04630	JAK-STAT signaling pathway	1/32	162/8049	0.478942	0.555753	0.523174	5618	1
hsa05161	Hepatitis B	1/32	162/8049	0.478942	0.555753	0.523174	3725	1
hsa04360	Axon guidance	1/32	181/8049	0.517719	0.589624	0.555059	6259	1
hsa04621	NOD-like receptor signaling pathway	1/32	181/8049	0.517719	0.589624	0.555059	3725	1
hsa05167	Kaposi sarcoma-associated herpesvirus infection	1/32	189/8049	0.533196	0.599213	0.564086	3725	1
hsa05202	Transcriptional misregulation in cancer	1/32	192/8049	0.538875	0.599213	0.564086	2308	1
hsa05130	Pathogenic Escherichia coli infection	1/32	193/8049	0.540753	0.599213	0.564086	3725	1
hsa04510	Focal adhesion	1/32	201/8049	0.555513	0.605213	0.569734	3725	1
hsa05169	Epstein-Barr virus infection	1/32	202/8049	0.557326	0.605213	0.569734	3725	1
hsa05203	Viral carcinogenesis	1/32	204/8049	0.560929	0.605213	0.569734	3725	1
hsa05170	Human immunodeficiency virus 1 infection	1/32	212/8049	0.57506	0.611602	0.575748	3725	1
hsa05132	Salmonella infection	1/32	213/8049	0.576795	0.611602	0.575748	3725	1
hsa04024	cAMP signaling pathway	1/32	216/8049	0.581959	0.611804	0.575938	3725	1
hsa05166	Human T-cell leukemia virus 1 infection	1/32	219/8049	0.587063	0.611938	0.576065	3725	1
hsa04060	Cytokine-cytokine receptor interaction	1/32	294/8049	0.69671	0.720128	0.677913	5618	1
hsa05016	Huntington disease	1/32	306/8049	0.711401	0.727981	0.685305	6648	1
hsa05206	MicroRNAs in cancer	1/32	310/8049	0.716144	0.727981	0.685305	672	1
hsa05165	Human papillomavirus infection	1/32	331/8049	0.739828	0.745892	0.702167	2308	1
hsa04080	Neuroactive ligand-receptor interaction	1/32	341/8049	0.750422	0.750422	0.706431	5618	1

## Sheet: DMR_KEGG
pathwayID	Description	GeneRatio	BgRatio	pvalue	qvalue	Count	genes	enrich_factor
hsa00532	Glycosaminoglycan biosynthesis	4/226	22/5894	3.728e-03	2.187e-01	4	XYLT1 CHSY1 DSE CHST11	4.74
hsa04966	Collecting duct acid secretion	4/226	27/5894	8.851e-03	3.116e-01	4	CLCNKB ATP6V0D2 ATP6V0A2 ATP6V0A1	3.86
hsa05100	Bacterial invasion of epithelial cells	9/226	71/5894	1.223e-03	2.152e-01	9	ITGB1 PTK2 SHC4 VCL WASF2 PIK3CB SRC DNM1 DOCK1	3.31
hsa04520	Adherens junction	9/226	73/5894	1.505e-03	1.324e-01	9	PTPRJ TGFBR2 FER SMAD2 PTPRM VCL WASF2 SRC TCF4	3.22
hsa05110	Vibrio cholerae infection	6/226	54/5894	1.165e-02	3.417e-01	6	ATP6V0D2 ATP6V0A2 KCNQ1 ATP6V0A1 SEC61A1 MUC2	2.90
hsa05412	Arrhythmogenic right ventricular cardiomyopathy (ARVC)	8/226	74/5894	5.873e-03	2.584e-01	8	PKP2 ITGB1 CACNA1C ITGB4 CACNA1D TCF4 LAMA2 SGCD	2.82
hsa04330	Notch signaling pathway	5/226	47/5894	2.197e-02	4.296e-01	5	PSENEN CTBP2 MAML3 CTBP1 NUMBL	2.77
hsa00100	Steroid biosynthesis	2/226	19/5894	7.676e-02	5.629e-01	2	SOAT1 FDFT1	2.75
hsa05216	Thyroid cancer	3/226	29/5894	5.472e-02	5.069e-01	3	NTRK1 NCOA4 TCF4	2.70
hsa01040	Biosynthesis of unsaturated fatty acids	2/226	21/5894	9.801e-02	5.750e-01	2	PTPLB ACOX3	2.48
hsa00260	Glycine, serine and threonine metabolism	3/226	32/5894	7.417e-02	5.676e-01	3	MAOB SARDH BHMT	2.44
hsa04370	VEGF signaling pathway	7/226	76/5894	2.184e-02	4.805e-01	7	NFATC1 PTGS2 PTK2 NFAT5 NFATC4 PIK3CB SRC	2.40
hsa00280	Valine, leucine and isoleucine degradation	4/226	44/5894	5.963e-02	5.247e-01	4	AUH MCCC1 HADH PCCA	2.37
hsa04962	Vasopressin-regulated water reabsorption	4/226	44/5894	5.963e-02	5.247e-01	4	DCTN2 DYNC1I1 DYNC2H1 DCTN4	2.37
hsa03060	Protein export	2/226	23/5894	1.218e-01	6.699e-01	2	SEC61A1 SPCS2	2.27
hsa05222	Small cell lung cancer	7/226	85/5894	3.957e-02	5.357e-01	7	ITGB1 LAMA4 PTGS2 PTK2 LAMC1 PIK3CB LAMA2	2.15
hsa05220	Chronic myeloid leukemia	6/226	73/5894	5.139e-02	5.320e-01	6	TGFBR2 MECOM SHC4 CTBP2 PIK3CB CTBP1	2.14
hsa00510	N-Glycan biosynthesis	4/226	49/5894	8.750e-02	5.923e-01	4	ALG13 RPN2 ST6GAL1 MGAT4A	2.13
hsa05131	Shigellosis	5/226	62/5894	7.152e-02	5.722e-01	5	ITGB1 VCL WASF2 DOCK1 UBE2D2	2.10
hsa05414	Dilated cardiomyopathy	7/226	90/5894	5.293e-02	5.175e-01	7	ITGB1 CACNA1C ITGB4 CACNA1D LAMA2 SGCD ADCY2	2.03
hsa00534	Glycosaminoglycan biosynthesis	2/226	26/5894	1.619e-01	7.499e-01	2	XYLT1 HS6ST3	2.01
hsa04360	Axon guidance	10/226	130/5894	2.966e-02	4.746e-01	10	ROBO1 EFNA5 ITGB1 NFATC1 EPHA5 SEMA6A PTK2 NFAT5 NFATC4 ABLIM1	2.01
hsa05146	Amoebiasis	8/226	106/5894	5.012e-02	5.513e-01	8	LAMA4 PTK2 VCL LAMC1 PIK3CB MUC2 LAMA2 GNAL	1.97
hsa04510	Focal adhesion	15/226	200/5894	1.351e-02	3.397e-01	15	PDGFD ITGB1 FLT4 LAMA4 PTK2 SHC4 VCL LAMC1 PIK3CB ITGB4 SRC LAMA2 DOCK1 RASGRF1 MYLK	1.96
hsa05217	Basal cell carcinoma	4/226	55/5894	1.297e-01	6.522e-01	4	PTCH1 WNT7A HHIP TCF4	1.90
hsa05410	Hypertrophic cardiomyopathy (HCM)	6/226	83/5894	9.121e-02	5.733e-01	6	ITGB1 CACNA1C ITGB4 CACNA1D LAMA2 SGCD	1.89
hsa04120	Ubiquitin mediated proteolysis	10/226	139/5894	4.540e-02	5.327e-01	10	HERC4 UBE2G1 PARK2 HERC1 HERC3 ITCH UBE2D2 UBE3B RHOBTB1 SMURF2	1.88
hsa04340	Hedgehog signaling pathway	4/226	56/5894	1.376e-01	6.727e-01	4	PTCH1 WNT7A HHIP CSNK1G1	1.86
hsa03440	Homologous recombination	2/226	28/5894	1.914e-01	7.834e-01	2	RAD54B XRCC3	1.86
hsa00380	Tryptophan metabolism	3/226	42/5894	1.639e-01	7.397e-01	3	MAOB HADH WARS2	1.86
hsa04512	ECM-receptor interaction	6/226	85/5894	1.010e-01	5.734e-01	6	ITGB1 LAMA4 LAMC1 ITGB4 SV2C LAMA2	1.84
hsa04810	Regulation of actin cytoskeleton	15/226	214/5894	2.408e-02	4.238e-01	15	IQGAP3 PDGFD ITGB1 CYFIP1 PTK2 VCL PIP5K1B WASF2 PIK3CB SSH2 ITGB4 DOCK1 ARHGEF7 MYLK ENAH	1.83
hsa00071	Fatty acid degradation	3/226	43/5894	1.749e-01	7.696e-01	3	HADH ACSL1 ACOX3	1.82
hsa04270	Vascular smooth muscle contraction	8/226	116/5894	8.068e-02	5.680e-01	8	CACNA1C KCNMA1 PRKCH CACNA1D PRKCQ GUCY1A3 ADCY2 MYLK	1.80
hsa04144	Endocytosis	14/226	203/5894	3.194e-02	4.685e-01	14	NTRK1 PSD3 TGFBR2 EHD4 SMAD2 SH3KBP1 ARAP1 PIP5K1B ITCH SRC DNM1 FAM125B ERBB4 SMURF2	1.80
hsa02010	ABC transporters	3/226	44/5894	1.862e-01	7.993e-01	3	ABCB7 ABCA2 ABCA13	1.78
hsa04940	Type I diabetes mellitus	3/226	45/5894	1.979e-01	7.916e-01	3	PTPRN2 ICA1 HLA-DRB5	1.74
hsa04540	Gap junction	6/226	90/5894	1.283e-01	6.641e-01	6	PDGFD MAP2K5 LPAR1 SRC GUCY1A3 ADCY2	1.74
hsa00512	Mucin type O-Glycan biosynthesis	2/226	30/5894	2.229e-01	8.528e-01	2	GALNTL4 WBSCR17	1.74
hsa04660	T cell receptor signaling pathway	7/226	108/5894	1.259e-01	6.715e-01	7	CD247 NFATC1 GRAP2 NFAT5 NFATC4 PIK3CB PRKCQ	1.69
hsa05210	Colorectal cancer	4/226	62/5894	1.908e-01	7.995e-01	4	TGFBR2 SMAD2 PIK3CB TCF4	1.68
hsa05310	Asthma	2/226	31/5894	2.393e-01	8.595e-01	2	MBP HLA-DRB5	1.68
hsa04145	Phagosome	10/226	156/5894	9.028e-02	5.885e-01	10	ITGB1 ATP6V0D2 DYNC1I1 ATP6V0A2 DYNC2H1 PLA2R1 ATP6V0A1 SEC61A1 HLA-DRB5 SCARB1	1.67
hsa00970	Aminoacyl-tRNA biosynthesis	4/226	63/5894	2.005e-01	7.842e-01	4	WARS2 FARS2 SARS2 NARS2	1.66
hsa00640	Propanoate metabolism	2/226	32/5894	2.562e-01	8.350e-01	2	ACSS3 PCCA	1.63
hsa04930	Type II diabetes mellitus	3/226	48/5894	2.348e-01	8.609e-01	3	CACNA1C PIK3CB CACNA1D	1.63
hsa04020	Calcium signaling pathway	11/226	177/5894	9.607e-02	5.830e-01	11	CACNA1C POR RYR3 CACNA1H EDNRB SLC8A3 CACNA1D GNAL ADCY2 MYLK ERBB4	1.62
hsa05200	Pathways in cancer	20/226	327/5894	4.303e-02	5.409e-01	20	DAPK2 NTRK1 TGFBR2 ITGB1 PTCH1 SMAD2 LAMA4 PTGS2 MECOM PTK2 NCOA4 LAMC1 RUNX1T1 WNT7A HHIP CTBP2 PIK3CB CTBP1 TCF4 LAMA2	1.60
hsa04310	Wnt signaling pathway	9/226	151/5894	1.487e-01	7.073e-01	9	NFATC1 SMAD2 NFAT5 NKD2 WNT7A NFATC4 CTBP2 CTBP1 TCF4	1.55
hsa04140	Regulation of autophagy	2/226	34/5894	2.911e-01	8.833e-01	2	ATG4A ATG7	1.53
hsa05120	Epithelial cell signaling in Helicobacter pylori infection	4/226	68/5894	2.528e-01	8.556e-01	4	ATP6V0D2 ATP6V0A2 ATP6V0A1 SRC	1.53
hsa04920	Adipocytokine signaling pathway	4/226	68/5894	2.528e-01	8.556e-01	4	ACSL1 PPARA PPARGC1A PRKCQ	1.53
hsa04150	mTOR signaling pathway	3/226	52/5894	2.883e-01	8.902e-01	3	PIK3CB RPTOR RPS6KA2	1.50
hsa04012	ErbB signaling pathway	5/226	87/5894	2.496e-01	8.614e-01	5	PTK2 SHC4 PIK3CB SRC ERBB4	1.50
hsa05142	Chagas disease (American trypanosomiasis)	6/226	104/5894	2.261e-01	8.467e-01	6	TGFBR2 CD247 CCL3 SMAD2 PIK3CB GNAL	1.50
hsa05143	African trypanosomiasis	2/226	35/5894	3.091e-01	8.918e-01	2	LAMA4 HPR	1.49
hsa04976	Bile secretion	4/226	71/5894	2.868e-01	9.014e-01	4	SLC4A2 SLC4A4 ADCY2 SCARB1	1.47
hsa04970	Salivary secretion	5/226	89/5894	2.690e-01	8.608e-01	5	RYR3 KCNMA1 SLC4A2 GUCY1A3 ADCY2	1.47
hsa03030	DNA replication	2/226	36/5894	3.274e-01	9.003e-01	2	PRIM2 RFC3	1.45
hsa00051	Fructose and mannose metabolism	2/226	36/5894	3.274e-01	9.003e-01	2	PFKFB1 MTMR7	1.45
hsa05323	Rheumatoid arthritis	5/226	92/5894	2.993e-01	8.779e-01	5	CCL3 ATP6V0D2 ATP6V0A2 ATP6V0A1 HLA-DRB5	1.42
hsa04971	Gastric acid secretion	4/226	74/5894	3.227e-01	9.161e-01	4	KCNQ1 SLC4A2 ADCY2 MYLK	1.41
hsa04141	Protein processing in endoplasmic reticulum	9/226	168/5894	2.462e-01	8.666e-01	9	SEC23B SEC24B UBE2G1 PARK2 DNAJC1 RPN2 SEC61A1 DNAJC5B UBE2D2	1.40
hsa04662	B cell receptor signaling pathway	4/226	75/5894	3.350e-01	8.800e-01	4	NFATC1 NFAT5 NFATC4 PIK3CB	1.39
hsa04666	Fc gamma R-mediated phagocytosis	5/226	95/5894	3.311e-01	8.829e-01	5	PPAP2B PIP5K1B WASF2 PIK3CB DNM1	1.37
hsa00562	Inositol phosphate metabolism	3/226	57/5894	3.610e-01	9.208e-01	3	PIP5K1B PIK3CB INPP4A	1.37
hsa05145	Toxoplasmosis	7/226	133/5894	2.975e-01	8.875e-01	7	ITGB1 LAMA4 LAMC1 HLA-DRB5 PIK3CB LAMA2 ALOX5	1.37
hsa05221	Acute myeloid leukemia	3/226	58/5894	3.762e-01	9.459e-01	3	RUNX1T1 PIK3CB TCF4	1.35
hsa04514	Cell adhesion molecules (CAMs)	7/226	136/5894	3.233e-01	9.032e-01	7	CADM1 ITGB1 GLG1 PTPRM NLGN4X HLA-DRB5 CNTN1	1.34
hsa00590	Arachidonic acid metabolism	3/226	59/5894	3.915e-01	9.570e-01	3	PTGS2 CYP2J2 ALOX5	1.33
hsa04142	Lysosome	6/226	121/5894	3.836e-01	9.509e-01	6	ATP6V0D2 LAMP3 ATP6V0A2 ABCA2 ATP6V0A1 SLC11A2	1.29
hsa04972	Pancreatic secretion	5/226	101/5894	3.987e-01	9.612e-01	5	KCNMA1 KCNQ1 SLC4A2 SLC4A4 ADCY2	1.29
hsa04974	Protein digestion and absorption	4/226	81/5894	4.125e-01	9.811e-01	4	COL18A1 KCNQ1 SLC1A1 SLC8A3	1.29
hsa05016	Huntington's disease	9/226	183/5894	3.549e-01	9.186e-01	9	DCTN2 NDUFA10 RCOR1 POR PPARGC1A DNAL4 DCTN4 NDUFB1 NDUFB5	1.28
hsa04960	Aldosterone-regulated sodium reabsorption	2/226	42/5894	4.431e-01	1	2	PIK3CB NR3C2	1.24
hsa04722	Neurotrophin signaling pathway	6/226	127/5894	4.475e-01	1	6	NTRK1 MAP2K5 TP73 SHC4 PIK3CB RPS6KA2	1.23
hsa05012	Parkinson's disease	6/226	130/5894	4.808e-01	1	6	NDUFA10 POR UBE2G1 PARK2 NDUFB1 NDUFB5	1.20
hsa04914	Progesterone-mediated oocyte maturation	4/226	87/5894	4.951e-01	1	4	MAD1L1 PIK3CB RPS6KA2 ADCY2	1.20
hsa04973	Carbohydrate digestion and absorption	2/226	44/5894	4.833e-01	1	2	PIK3CB CACNA1D	1.19
hsa00310	Lysine degradation	2/226	44/5894	4.833e-01	1	2	HADH SETD7	1.19
hsa00190	Oxidative phosphorylation	6/226	132/5894	5.033e-01	1	6	NDUFA10 ATP6V0D2 ATP6V0A2 ATP6V0A1 NDUFB1 NDUFB5	1.19
hsa04650	Natural killer cell mediated cytotoxicity	6/226	136/5894	5.493e-01	1	6	CD247 NFATC1 SHC4 NFAT5 NFATC4 PIK3CB	1.15
hsa04975	Fat digestion and absorption	2/226	46/5894	5.241e-01	1	2	PPAP2B SCARB1	1.13
hsa00230	Purine metabolism	7/226	162/5894	5.820e-01	1	7	PRIM2 NT5C2 POLR1A GUCY1A3 ADCY2 PDE11A PDE8A	1.13
hsa00514	Other types of O-glycan biosynthesis	2/226	46/5894	5.241e-01	1	2	ST6GAL1 B3GALTL	1.13
hsa03320	PPAR signaling pathway	3/226	70/5894	5.708e-01	1	3	ACSL1 PPARA ACOX3	1.12
hsa05212	Pancreatic cancer	3/226	70/5894	5.708e-01	1	3	TGFBR2 SMAD2 PIK3CB	1.12
hsa05010	Alzheimer's disease	7/226	168/5894	6.479e-01	1	7	PSENEN NDUFA10 CACNA1C RYR3 NDUFB1 CACNA1D NDUFB5	1.09
hsa05416	Viral myocarditis	3/226	72/5894	6.047e-01	1	3	HLA-DRB5 LAMA2 SGCD	1.09
hsa05140	Leishmaniasis	3/226	73/5894	6.218e-01	1	3	ITGB1 PTGS2 HLA-DRB5	1.07
hsa01100	Metabolic pathways	46/226	1131/5894	6.637e-01	1	46	GALNTL4 AUH LIPC PRIM2 NT5C2 HYAL1 NDUFA10 SLC33A1 MAOB MCCC1 XYLT1 HADH ATP6V0D2 PPAP2B CRLS1 ATP6V0A2 SARDH PTGS2 ACSL1 REV3L UXS1 CHKA CHSY1 ACSS3 CSAD PCCA ALG13 POLR1A RPN2 PIP5K1B ATP6V0A1 ST6GAL1 MTHFD1L NDUFB1 FDFT1 CYP2J2 HLCS BHMT PIGN MGAT4A ACOX3 WBSCR17 ALOX5 INPP4A UCK2 NDUFB5	1.06
hsa00240	Pyrimidine metabolism	4/226	99/5894	6.699e-01	1	4	PRIM2 NT5C2 POLR1A UCK2	1.05
hsa00561	Glycerolipid metabolism	2/226	50/5894	6.066e-01	1	2	LIPC PPAP2B	1.04
hsa04916	Melanogenesis	4/226	101/5894	6.997e-01	1	4	WNT7A EDNRB TCF4 ADCY2	1.03
hsa04912	GnRH signaling pathway	4/226	101/5894	6.997e-01	1	4	CACNA1C SRC CACNA1D ADCY2	1.03
hsa00592	alpha-Linolenic acid metabolism	1/226	20/5894	1	1	1	ACOX3	1.00
hsa00670	One carbon pool by folate	1/226	18/5894	1	1	1	MTHFD1L	1.00
hsa05330	Allograft rejection	1/226	39/5894	1	1	1	HLA-DRB5	1.00
hsa00340	Histidine metabolism	1/226	29/5894	1	1	1	MAOB	1.00
hsa00360	Phenylalanine metabolism	1/226	17/5894	1	1	1	MAOB	1.00
hsa05130	Pathogenic Escherichia coli infection	1/226	58/5894	1	1	1	ITGB1	1.00
hsa04664	Fc epsilon RI signaling pathway	1/226	79/5894	1	1	1	PIK3CB	1.00
hsa04964	Proximal tubule bicarbonate reclamation	1/226	23/5894	1	1	1	SLC4A4	1.00
hsa00900	Terpenoid backbone biosynthesis	1/226	15/5894	1	1	1	PDSS2	1.00
hsa05014	Amyotrophic lateral sclerosis (ALS)	1/226	54/5894	1	1	1	ALS2	1.00
hsa05320	Autoimmune thyroid disease	1/226	54/5894	1	1	1	HLA-DRB5	1.00
hsa04612	Antigen processing and presentation	1/226	78/5894	1	1	1	HLA-DRB5	1.00
hsa00270	Cysteine and methionine metabolism	1/226	36/5894	1	1	1	BHMT	1.00
hsa04621	NOD-like receptor signaling pathway	1/226	59/5894	1	1	1	ERBB2IP	1.00
hsa03420	Nucleotide excision repair	1/226	45/5894	1	1	1	RFC3	1.00
hsa04070	Phosphatidylinositol signaling system	3/226	78/5894	7.073e-01	1	3	PIP5K1B PIK3CB INPP4A	1.00
hsa00062	Fatty acid elongation	1/226	8/5894	1	1	1	HADH	1.00
hsa00500	Starch and sucrose metabolism	1/226	54/5894	1	1	1	UXS1	1.00
hsa00591	Linoleic acid metabolism	1/226	30/5894	1	1	1	CYP2J2	1.00
hsa00982	Drug metabolism	1/226	73/5894	1	1	1	MAOB	1.00
hsa04742	Taste transduction	1/226	52/5894	1	1	1	ACCN1	1.00
hsa00533	Glycosaminoglycan biosynthesis	1/226	15/5894	1	1	1	CHST4	1.00
hsa05332	Graft-versus-host disease	1/226	43/5894	1	1	1	HLA-DRB5	1.00
hsa00565	Ether lipid metabolism	1/226	36/5894	1	1	1	PPAP2B	1.00
hsa00350	Tyrosine metabolism	1/226	41/5894	1	1	1	MAOB	1.00
hsa00531	Glycosaminoglycan degradation	1/226	19/5894	1	1	1	HYAL1	1.00
hsa05150	Staphylococcus aureus infection	1/226	56/5894	1	1	1	HLA-DRB5	1.00
hsa00780	Biotin metabolism	1/226	2/5894	1	1	1	HLCS	1.00
hsa04640	Hematopoietic cell lineage	1/226	88/5894	1	1	1	HLA-DRB5	1.00
hsa00983	Drug metabolism	1/226	52/5894	1	1	1	UCK2	1.00
hsa05223	Non-small cell lung cancer	1/226	54/5894	1	1	1	PIK3CB	1.00
hsa00430	Taurine and hypotaurine metabolism	1/226	10/5894	1	1	1	CSAD	1.00
hsa04740	Olfactory transduction	1/226	388/5894	1	1	1	GNAL	1.00
hsa00650	Butanoate metabolism	1/226	30/5894	1	1	1	HADH	1.00
hsa00330	Arginine and proline metabolism	1/226	54/5894	1	1	1	MAOB	1.00
hsa00520	Amino sugar and nucleotide sugar metabolism	1/226	48/5894	1	1	1	UXS1	1.00
hsa00604	Glycosphingolipid biosynthesis	1/226	15/5894	1	1	1	SLC33A1	1.00
hsa00563	Glycosylphosphatidylinositol(GPI)-anchor biosynthesis	1/226	25/5894	1	1	1	PIGN	1.00
hsa00600	Sphingolipid metabolism	1/226	40/5894	1	1	1	PPAP2B	1.00
hsa05211	Renal cell carcinoma	1/226	70/5894	1	1	1	PIK3CB	1.00
hsa00630	Glyoxylate and dicarboxylate metabolism	1/226	18/5894	1	1	1	PCCA	1.00
hsa00760	Nicotinate and nicotinamide metabolism	1/226	24/5894	1	1	1	NT5C2	1.00
hsa05213	Endometrial cancer	2/226	52/5894	6.481e-01	1	2	PIK3CB TCF4	1.00
hsa03020	RNA polymerase	1/226	29/5894	1	1	1	POLR1A	1.00
hsa05219	Bladder cancer	1/226	42/5894	1	1	1	DAPK2	1.00
hsa03430	Mismatch repair	1/226	23/5894	1	1	1	RFC3	1.00
hsa04672	Intestinal immune network for IgA production	1/226	49/5894	1	1	1	HLA-DRB5	1.00
hsa05020	Prion diseases	1/226	36/5894	1	1	1	LAMC1	1.00
hsa04730	Long-term depression	1/226	70/5894	1	1	1	GUCY1A3	1.00
hsa04622	RIG-I-like receptor signaling pathway	1/226	71/5894	1	1	1	TRIM25	1.00
hsa00920	Sulfur metabolism	1/226	13/5894	1	1	1	CHST11	1.00
hsa03040	Spliceosome	1/226	128/5894	1	1	1	PRPF40A	1.00
hsa03050	Proteasome	1/226	45/5894	1	1	1	PSMD11	1.00
hsa04977	Vitamin digestion and absorption	1/226	24/5894	1	1	1	SCARB1	1.00
hsa04146	Peroxisome	3/226	79/5894	1	1	3	ACSL1 PEX11G ACOX3	0.99
hsa00564	Glycerophospholipid metabolism	3/226	80/5894	1	1	3	PPAP2B CRLS1 CHKA	0.98
hsa04530	Tight junction	5/226	133/5894	1	1	5	INADL EPB41 PRKCH SRC PRKCQ	0.98
hsa03008	Ribosome biogenesis in eukaryotes	3/226	81/5894	1	1	3	LSG1 NOL6 SPATA5	0.97
hsa04010	MAPK signaling pathway	10/226	268/5894	1	1	10	NTRK1 MAP2K5 TGFBR2 CACNA1C MECOM CACNA1H NFATC4 CACNA1D RPS6KA2 RASGRF1	0.97
hsa04080	Neuroactive ligand-receptor interaction	10/226	272/5894	1	1	10	GALR1 GLRB VIPR2 GRIK1 LPAR1 EDNRB NR3C1 GABRB2 GABBR2 GRM8	0.96
hsa04350	TGF-beta signaling pathway	3/226	85/5894	1	1	3	TGFBR2 SMAD2 SMURF2	0.92
hsa04670	Leukocyte transendothelial migration	4/226	117/5894	1	1	4	ITGB1 PTK2 VCL PIK3CB	0.89
hsa05215	Prostate cancer	3/226	89/5894	1	1	3	PDGFD PIK3CB TCF4	0.88
hsa05214	Glioma	2/226	65/5894	1	1	2	SHC4 PIK3CB	0.80
hsa04910	Insulin signaling pathway	4/226	138/5894	1	1	4	SHC4 PPARGC1A PIK3CB RPTOR	0.76
hsa04115	p53 signaling pathway	2/226	69/5894	1	1	2	CD82 TP73	0.76
hsa04720	Long-term potentiation	2/226	70/5894	1	1	2	CACNA1C RPS6KA2	0.75
hsa05218	Melanoma	2/226	71/5894	1	1	2	PDGFD PIK3CB	0.73
hsa04062	Chemokine signaling pathway	5/226	189/5894	1	1	5	CCL3 PTK2 SHC4 PIK3CB ADCY2	0.69
hsa04260	Cardiac muscle contraction	2/226	77/5894	1	1	2	CACNA1C CACNA1D	0.68
hsa03015	mRNA surveillance pathway	2/226	83/5894	1	1	2	MSI2 FIP1L1	0.63
hsa04380	Osteoclast differentiation	3/226	128/5894	1	1	3	TGFBR2 NFATC1 PIK3CB	0.61
hsa04110	Cell cycle	3/226	128/5894	1	1	3	SMAD2 MAD1L1 TFDP2	0.61
hsa04210	Apoptosis	2/226	89/5894	1	1	2	NTRK1 PIK3CB	0.59
hsa05160	Hepatitis C	3/226	135/5894	1	1	3	PPARA PIK3CB SCARB1	0.58
hsa04620	Toll-like receptor signaling pathway	2/226	102/5894	1	1	2	CCL3 PIK3CB	0.51
hsa04114	Oocyte meiosis	2/226	114/5894	1	1	2	RPS6KA2 ADCY2	0.46
hsa05322	Systemic lupus erythematosus	2/226	138/5894	1	1	2	ELANE HLA-DRB5	0.38
hsa04630	Jak-STAT signaling pathway	2/226	155/5894	1	1	2	STAT4 PIK3CB	0.34
hsa03013	RNA transport	2/226	152/5894	1	1	2	TACC3 NUP210	0.34
hsa04060	Cytokine-cytokine receptor interaction	3/226	265/5894	1	1	3	TGFBR2 CCL3 FLT4	0.30
